# Supplementary material for: On the non-innocence and reactiveversusnon-reactive nature of α-diketones in a set of diruthenium frameworks
Source: Royal Society of Chemistry journal article supplement (doi:10.1039/d0dt03400b), 2020-12-10
Supplement: d0dt03400b1.pdf [file d0dt03400b1.pdf]

## **On the non-innocence and reactive *versus* non-reactive nature of $\alpha$ -diketones in a set of diruthenium frameworks**

Farheen Fatima Khan,<sup>‡</sup> Saikat Mondal,<sup>‡</sup> Shubhadeep Chandra,<sup>#</sup> Nicolas I. Neuman,<sup>#</sup> Biprajit Sarkar,<sup>\*,#</sup> and Goutam Kumar Lahiri<sup>\*,‡</sup>

<sup>‡</sup>*Department of Chemistry, Indian Institute of Technology Bombay, Powai, Mumbai-400076, India. Email: lahiri@chem.iitb.ac.in*

<sup>#</sup>*Lehrstuhl für Anorganische Koordinationschemie, Institut für Anorganische Chemie, Universität Stuttgart, Pfaffenwaldring 55, D-70550 Stuttgart, Germany. Email: biprajit.sarkar@iac.uni-stuttgart.de*

**Table S1** Selected crystallographic data

|                                                                                      | [2](ClO4) <sub>2</sub> •C <sub>6</sub> H <sub>6</sub>                                          | [3](ClO4) <sub>2</sub>                                                                          |
|--------------------------------------------------------------------------------------|------------------------------------------------------------------------------------------------|-------------------------------------------------------------------------------------------------|
| empirical formula                                                                    | C <sub>60</sub> H <sub>46</sub> Cl <sub>2</sub> N <sub>8</sub> O <sub>12</sub> Ru <sub>2</sub> | C <sub>58</sub> H <sub>44</sub> Cl <sub>2</sub> N <sub>12</sub> O <sub>12</sub> Ru <sub>2</sub> |
| formula weight                                                                       | 1344.09                                                                                        | 1374.09                                                                                         |
| crystal system                                                                       | Triclinic                                                                                      | monoclinic                                                                                      |
| space group                                                                          | <i>P</i> $\bar{1}$                                                                             | <i>P</i> 2/n                                                                                    |
| <i>a</i> (Å)                                                                         | 15.5752(6)                                                                                     | 13.6797(7)                                                                                      |
| <i>b</i> (Å)                                                                         | 15.6427(5)                                                                                     | 10.7866(6)                                                                                      |
| <i>c</i> (Å)                                                                         | 16.7119(7)                                                                                     | 19.9547(14)                                                                                     |
| $\alpha$ (deg)                                                                       | 102.235(3)                                                                                     | 90                                                                                              |
| $\beta$ (deg)                                                                        | 103.995(3)                                                                                     | 95.896(6)                                                                                       |
| $\gamma$ (deg)                                                                       | 115.029(3)                                                                                     | 90                                                                                              |
| <i>V</i> (Å <sup>3</sup> )                                                           | 3343.3(2)                                                                                      | 2928.9(3)                                                                                       |
| <i>Z</i>                                                                             | 2                                                                                              | 2                                                                                               |
| $\mu$ (mm <sup>-1</sup> )                                                            | 0.592                                                                                          | 0.680                                                                                           |
| <i>T</i> (K)                                                                         | 150(2)                                                                                         | 150(2)                                                                                          |
| $\rho_{\text{calcd}}$ (g cm <sup>-3</sup> )                                          | 1.335                                                                                          | 1.558                                                                                           |
| <i>F</i> (000)                                                                       | 1360                                                                                           | 1388                                                                                            |
| $\theta$ range (deg)                                                                 | 25.252 to 2.028                                                                                | 26.370 to 2.409                                                                                 |
| data / restraints /<br>parameters                                                    | 12099/2140/1012                                                                                | 5993/58/435                                                                                     |
| <i>R</i> <sub>1</sub> , <i>wR</i> <sub>2</sub> [ <i>I</i> > 2 $\sigma$ ( <i>I</i> )] | 0.0914, 0.2169                                                                                 | 0.0797, 0.1737                                                                                  |
| <i>R</i> <sub>1</sub> , <i>wR</i> <sub>2</sub> (all data)                            | 0.1410, 0.2586                                                                                 | 0.1279, 0.2082                                                                                  |
| GOF on <i>F</i> <sup>2</sup>                                                         | 1.041                                                                                          | 1.049                                                                                           |
| largest difference in<br>peak and hole (e Å <sup>-3</sup> )                          | 1.383, -0.919                                                                                  | 1.329, -0.777                                                                                   |

**Table S2** Selected DFT calculated bond lengths [ $\text{\AA}$ ] for **1a<sup>n</sup>**

| Bond    | DFT       |                       |                        |                       |                        |
|---------|-----------|-----------------------|------------------------|-----------------------|------------------------|
|         | <b>1a</b> | <b>1a<sup>+</sup></b> | <b>1a<sup>2+</sup></b> | <b>1a<sup>-</sup></b> | <b>1a<sup>2-</sup></b> |
| Ru1-O1  | 2.001     | 2.000                 | 1.966                  | 2.012                 | 2.065                  |
| Ru1-O2  | 2.074     | 2.073                 | 2.090                  | 2.070                 | 2.073                  |
| Ru1-O5  | 2.040     | 2.016                 | 1.993                  | 2.071                 | 2.098                  |
| Ru1-O6  | 2.057     | 2.036                 | 2.022                  | 2.074                 | 2.097                  |
| Ru1-O7  | 2.041     | 2.030                 | 2.016                  | 2.047                 | 2.080                  |
| Ru1-O8  | 2.035     | 2.012                 | 1.990                  | 2.065                 | 2.088                  |
| Ru2-O3  | 2.076     | 2.068                 | 1.967                  | 2.036                 | 2.068                  |
| Ru2-O4  | 2.001     | 1.987                 | 2.085                  | 2.066                 | 2.067                  |
| Ru2-O9  | 2.036     | 2.008                 | 1.989                  | 2.073                 | 2.099                  |
| Ru2-O10 | 2.030     | 2.018                 | 2.015                  | 2.072                 | 2.085                  |
| Ru2-O11 | 2.063     | 2.034                 | 2.017                  | 2.068                 | 2.087                  |
| Ru2-O12 | 2.041     | 2.013                 | 1.991                  | 2.063                 | 2.088                  |
| C7-O2   | 1.254     | 1.256                 | 1.257                  | 1.257                 | 1.258                  |
| C8-O3   | 1.254     | 1.256                 | 1.535                  | 1.529                 | 1.536                  |
| C7-C8   | 1.531     | 1.530                 | 1.257                  | 1.257                 | 1.257                  |

**Table S3** Selected DFT calculated bond angles [deg] for **1a<sup>n</sup>**

| Bond        | DFT       |                       |                        |                       |                        |
|-------------|-----------|-----------------------|------------------------|-----------------------|------------------------|
|             | <b>1a</b> | <b>1a<sup>+</sup></b> | <b>1a<sup>2+</sup></b> | <b>1a<sup>-</sup></b> | <b>1a<sup>2-</sup></b> |
| O1-Ru1-O2   | 89.39     | 88.51                 | 87.37                  | 90.27                 | 90.15                  |
| O5-Ru1-O6   | 89.81     | 89.31                 | 88.10                  | 90.40                 | 91.57                  |
| O7-Ru1-O8   | 93.40     | 92.61                 | 91.55                  | 92.75                 | 91.87                  |
| O1-Ru1-O5   | 179.84    | 179.55                | 179.19                 | 178.79                | 178.19                 |
| O2-Ru1-O8   | 179.51    | 178.47                | 177.33                 | 179.13                | 178.64                 |
| O6-Ru1-O7   | 178.01    | 178.31                | 177.19                 | 178.16                | 178.35                 |
| O3-Ru2-O4   | 89.23     | 88.26                 | 87.35                  | 90.08                 | 90.36                  |
| O9-Ru2-O10  | 93.31     | 92.02                 | 88.21                  | 91.22                 | 91.69                  |
| O11-Ru2-O12 | 89.53     | 88.93                 | 91.52                  | 91.21                 | 92.08                  |
| O3-Ru2-O9   | 178.83    | 178.32                | 179.62                 | 178.71                | 178.26                 |
| O4-Ru2-O12  | 179.50    | 179.55                | 177.38                 | 179.12                | 179.12                 |
| O10-Ru2-O11 | 177.98    | 178.04                | 176.99                 | 178.21                | 178.08                 |

**Table S4** Selected experimental and DFT calculated bond lengths [ $\text{\AA}$ ] for  $2^n$ <sup>‡</sup>

| Bond    | X-ray     |          | DFT      |          |       |       |       |
|---------|-----------|----------|----------|----------|-------|-------|-------|
|         | $2^{2+}$  | $2^{2+}$ | $2^{3+}$ | $2^{4+}$ | $2^+$ | $2$   | $2^-$ |
| Ru1-O1  | 2.047(6)  | 2.073    | 2.031    | 1.982    | 2.087 | 2.103 | 2.107 |
| Ru1-O2  | 2.042(5)  | 2.105    | 2.120    | 2.150    | 2.091 | 2.110 | 2.111 |
| Ru1-N1A | 2.025(16) | 2.093    | 2.109    | 2.126    | 2.086 | 2.071 | 2.079 |
| Ru1-N2A | 2.147(12) | 2.097    | 2.115    | 2.136    | 2.092 | 2.095 | 2.099 |
| Ru1-N3  | 2.067(6)  | 2.091    | 2.097    | 2.097    | 2.095 | 2.095 | 2.097 |
| Ru1-N4  | 2.038(6)  | 2.078    | 2.084    | 2.080    | 2.067 | 2.055 | 2.062 |
| Ru2-O3  | 2.035(5)  | 2.115    | 2.134    | 2.159    | 2.107 | 2.120 | 2.128 |
| Ru2-O4  | 2.053(6)  | 2.073    | 2.034    | 1.982    | 2.091 | 2.101 | 2.108 |
| Ru2-N5  | 2.029(7)  | 2.081    | 2.086    | 2.081    | 2.061 | 2.055 | 2.066 |
| Ru2-N6  | 2.049(8)  | 2.095    | 2.100    | 2.098    | 2.091 | 2.094 | 2.101 |
| Ru2-N7  | 2.023(15) | 2.093    | 2.112    | 2.133    | 2.097 | 2.097 | 2.101 |
| Ru2-N8  | 2.007(12) | 2.093    | 2.110    | 2.130    | 2.089 | 2.071 | 2.075 |
| C7-O2   | 1.265(9)  | 1.265    | 1.260    | 1.259    | 1.261 | 1.258 | 1.257 |
| C8-O3   | 1.283(9)  | 1.267    | 1.261    | 1.258    | 1.264 | 1.261 | 1.259 |
| C7-C8   | 1.515(11) | 1.539    | 1.543    | 1.552    | 1.535 | 1.537 | 1.538 |

<sup>‡</sup>Out of four bipyridine molecules, three were disordered and modeled through PART command. Hence, geometrical parameters with respect to major occupancy have been described here.

**Table S5** Selected experimental and DFT calculated bond angles [deg] for **2<sup>n</sup>**<sup>‡</sup>

| Bond        | X-ray                 |                       | DFT                   |                       |                      |          |                      |
|-------------|-----------------------|-----------------------|-----------------------|-----------------------|----------------------|----------|----------------------|
|             | <b>2<sup>2+</sup></b> | <b>2<sup>2+</sup></b> | <b>2<sup>3+</sup></b> | <b>2<sup>4+</sup></b> | <b>2<sup>+</sup></b> | <b>2</b> | <b>2<sup>-</sup></b> |
| O1-Ru1-O2   | 91.5(2)               | 89.17                 | 88.08                 | 87.00                 | 88.70                | 87.88    | 88.12                |
| N1A-Ru1-N2A | 76.9(4)               | 78.08                 | 77.63                 | 77.22                 | 78.47                | 78.79    | 78.88                |
| N3-Ru1-N4   | 78.1(2)               | 78.51                 | 78.44                 | 78.49                 | 78.64                | 78.97    | 79.06                |
| O1-Ru1-N1A  | 172.5(4)              | 172.97                | 173.77                | 174.63                | 172.48               | 173.21   | 173.00               |
| O2-Ru1-N4   | 167.8(3)              | 172.25                | 172.68                | 172.98                | 172.56               | 172.74   | 172.49               |
| N2A-Ru1-N3  | 178.4(6)              | 176.82                | 174.40                | 172.23                | 176.11               | 174.28   | 174.42               |
| O3-Ru2-O4   | 91.2(2)               | 88.77                 | 87.92                 | 86.90                 | 88.63                | 87.55    | 87.59                |
| N5-Ru2-N6   | 79.6(3)               | 78.34                 | 78.35                 | 78.48                 | 78.58                | 78.89    | 79.07                |
| N7-Ru2-N8   | 80.1(5)               | 78.15                 | 77.68                 | 77.14                 | 78.58                | 78.80    | 78.83                |
| O3-Ru2-N5   | 175.2(3)              | 171.96                | 172.15                | 171.19                | 173.79               | 173.51   | 173.65               |
| O4-Ru2-N8   | 169.5(4)              | 172.35                | 172.85                | 172.95                | 172.74               | 173.26   | 173.53               |
| N6-Ru2-N7   | 179.5(7)              | 175.29                | 172.72                | 170.74                | 176.03               | 174.24   | 178.83               |

<sup>‡</sup>Out of four bipyridine molecules, three were disordered and modeled through PART command. Hence, geometrical parameters with respect to major occupancy have been described here.

**Table S6** Selected experimental and DFT calculated bond lengths [ $\text{\AA}$ ] for  $\mathbf{3}^n$ 

| Bond   | X-ray             |                   | DFT               |                |              |
|--------|-------------------|-------------------|-------------------|----------------|--------------|
|        | $\mathbf{3}^{2+}$ | $\mathbf{3}^{2+}$ | $\mathbf{3}^{3+}$ | $\mathbf{3}^+$ | $\mathbf{3}$ |
| Ru1-O1 | 2.032(4)          | 2.063             | 2.037             | 2.079          | 2.098        |
| Ru1-O2 | 2.056(5)          | 2.108             | 2.131             | 2.114          | 2.133        |
| Ru1-N1 | 1.989(5)          | 2.056             | 2.101             | 2.086          | 2.047        |
| Ru1-N3 | 2.044(6)          | 2.082             | 2.104             | 2.090          | 2.100        |
| Ru1-N4 | 2.022(6)          | 2.089             | 2.090             | 2.084          | 2.081        |
| Ru1-N6 | 1.979(6)          | 2.079             | 2.078             | 2.020          | 2.002        |
| C7-O2  | 1.262(8)          | 1.268             | 1.260             | 1.263          | 1.260        |
| N1-N2  | 1.288(7)          | 1.281             | 1.276             | 1.305          | 1.325        |
| N5-N6  | 1.286(7)          | 1.283             | 1.278             | 1.293          | 1.315        |

**Table S7** Selected experimental and DFT calculated bond angles [deg] for **3<sup>n</sup>**

| Bond      | X-ray                 |                       | DFT                   |                      |          |
|-----------|-----------------------|-----------------------|-----------------------|----------------------|----------|
|           | <b>3<sup>2+</sup></b> | <b>3<sup>2+</sup></b> | <b>3<sup>3+</sup></b> | <b>3<sup>+</sup></b> | <b>3</b> |
| O1-Ru1-O2 | 89.03(18)             | 88.05                 | 87.25                 | 87.29                | 85.76    |
| N1-Ru1-N3 | 77.6(2)               | 76.21                 | 75.80                 | 76.32                | 76.62    |
| N4-Ru1-N6 | 77.0(2)               | 76.52                 | 76.49                 | 76.65                | 76.89    |
| O1-Ru1-N1 | 168.1(2)              | 168.96                | 169.72                | 167.95               | 168.18   |
| O2-Ru1-N6 | 173.1(2)              | 169.58                | 169.93                | 170.56               | 171.25   |
| N4-Ru1-N3 | 177.2(2)              | 177.96                | 179.59                | 178.63               | 178.18   |



**Table S8** Composition and energies of selected molecular orbitals of **1a(rac)** ( $S=1$ )

| MO             | Energy(eV) | Composition |      |                   |
|----------------|------------|-------------|------|-------------------|
|                |            | Ru          | L    | acac <sup>-</sup> |
| $\alpha$ -spin |            |             |      |                   |
| HOMO-5         | -5.905     | 0.63        | 0.13 | 0.24              |
| HOMO-4         | -5.853     | 0.55        | 0.14 | 0.31              |
| HOMO-3         | -5.564     | 0.47        | 0.08 | 0.45              |
| HOMO-2         | -5.511     | 0.49        | 0.12 | 0.39              |
| SOMO2          | -5.454     | 0.27        | 0.53 | 0.20              |
| SOMO1          | -5.385     | 0.29        | 0.56 | 0.15              |
| LUMO           | -2.014     | 0.05        | 0.94 | 0.01              |
| LUMO+1         | -1.595     | 0.06        | 0.92 | 0.02              |
| LUMO+2         | -1.036     | 0.05        | 0.03 | 0.92              |
| LUMO+3         | -0.996     | 0.09        | 0.02 | 0.89              |
| LUMO+4         | -0.943     | 0.03        | 0.01 | 0.95              |
| LUMO+5         | -0.942     | 0.05        | 0.01 | 0.95              |
| $\beta$ -spin  |            |             |      |                   |
| HOMO-5         | -5.852     | 0.21        | 0.53 | 0.26              |
| HOMO-4         | -5.780     | 0.23        | 0.63 | 0.15              |
| HOMO-3         | -5.604     | 0.67        | 0.14 | 0.19              |
| HOMO-2         | -5.541     | 0.67        | 0.16 | 0.18              |
| HOMO-1         | -5.276     | 0.53        | 0.22 | 0.25              |
| HOMO           | -5.255     | 0.57        | 0.11 | 0.32              |
| LUMO           | -2.887     | 0.67        | 0.13 | 0.20              |
| LUMO+1         | -2.823     | 0.65        | 0.17 | 0.18              |
| LUMO+2         | -1.940     | 0.09        | 0.89 | 0.02              |
| LUMO+3         | -1.536     | 0.07        | 0.91 | 0.03              |
| LUMO+4         | -0.990     | 0.04        | 0.03 | 0.93              |
| LUMO+5         | -0.948     | 0.08        | 0.02 | 0.90              |

| $\alpha$ -spin                                                                      |                                                                                     |                                                                                      |                                                                                       |
|-------------------------------------------------------------------------------------|-------------------------------------------------------------------------------------|--------------------------------------------------------------------------------------|---------------------------------------------------------------------------------------|
| 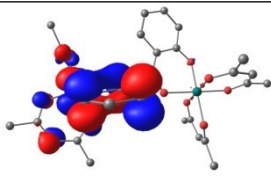   |    |    |    |
| SOMO1                                                                               | SOMO2                                                                               | HOMO-2                                                                               | HOMO-3                                                                                |
|    |    |    |    |
| LUMO                                                                                | LUMO+1                                                                              | LUMO+2                                                                               | LUMO+3                                                                                |
| $\beta$ -spin                                                                       |                                                                                     |                                                                                      |                                                                                       |
|   |   |   |   |
| HOMO                                                                                | HOMO-1                                                                              | HOMO-2                                                                               | HOMO-3                                                                                |
|  |  |  |  |
| LUMO                                                                                | LUMO+1                                                                              | LUMO+2                                                                               | LUMO+3                                                                                |

**Table S9** Composition and energies of selected molecular orbitals of **1a<sup>+</sup>(rac)** (*S*=3/2)

| MO             | Energy(eV) | Composition |      |                   |
|----------------|------------|-------------|------|-------------------|
|                |            | Ru          | L    | acac <sup>-</sup> |
| $\alpha$ -spin |            |             |      |                   |
| HOMO-5         | -8.931     | 0.14        | 0.06 | 0.80              |
| HOMO-4         | -8.825     | 0.14        | 0.10 | 0.76              |
| HOMO-3         | -8.723     | 0.17        | 0.22 | 0.60              |
| SOMO3          | -8.617     | 0.22        | 0.19 | 0.58              |
| SOMO2          | -8.421     | 0.22        | 0.56 | 0.22              |
| SOMO1          | -8.320     | 0.23        | 0.54 | 0.23              |
| LUMO           | -4.911     | 0.06        | 0.92 | 0.02              |
| LUMO+1         | -4.510     | 0.08        | 0.88 | 0.03              |
| LUMO+2         | -3.836     | 0.22        | 0.04 | 0.73              |
| LUMO+3         | -3.706     | 0.46        | 0.18 | 0.46              |
| LUMO+4         | -3.687     | 0.21        | 0.06 | 0.74              |
| LUMO+5         | -3.666     | 0.05        | 0.02 | 0.94              |
| $\beta$ -spin  |            |             |      |                   |
| HOMO-5         | -8.887     | 0.26        | 0.15 | 0.59              |
| HOMO-4         | -8.761     | 0.67        | 0.16 | 0.18              |
| HOMO-3         | -8.616     | 0.66        | 0.18 | 0.16              |
| HOMO-2         | -8.566     | 0.15        | 0.46 | 0.39              |
| HOMO-1         | -8.513     | 0.18        | 0.42 | 0.39              |
| HOMO           | -7.685     | 0.56        | 0.18 | 0.26              |
| LUMO           | -7.264     | 0.57        | 0.18 | 0.25              |
| LUMO+1         | -6.060     | 0.62        | 0.17 | 0.20              |
| LUMO+2         | -5.896     | 0.63        | 0.18 | 0.19              |
| LUMO+3         | -4.787     | 0.10        | 0.88 | 0.02              |
| LUMO+4         | -4.411     | 0.08        | 0.90 | 0.02              |
| LUMO+5         | -3.715     | 0.08        | 0.03 | 0.89              |

| $\alpha$ -spin                                                                      |                                                                                     |                                                                                      |                                                                                       |
|-------------------------------------------------------------------------------------|-------------------------------------------------------------------------------------|--------------------------------------------------------------------------------------|---------------------------------------------------------------------------------------|
| 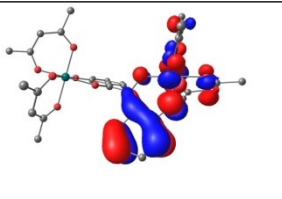   |    |    |    |
| SOMO1                                                                               | SOMO2                                                                               | SOMO3                                                                                | HOMO-3                                                                                |
|    |    |    |    |
| LUMO                                                                                | LUMO+1                                                                              | LUMO+2                                                                               | LUMO+3                                                                                |
| $\beta$ -spin                                                                       |                                                                                     |                                                                                      |                                                                                       |
|   |   |   |   |
| HOMO                                                                                | HOMO-1                                                                              | HOMO-2                                                                               | HOMO-3                                                                                |
|  |  |  |  |
| LUMO                                                                                | LUMO+1                                                                              | LUMO+2                                                                               | LUMO+3                                                                                |

**Table S10** Composition and energies of selected molecular orbitals of **1a<sup>2+</sup>(rac)** (*S*=1)

| MO             | Energy(eV) | Composition |      |                   |
|----------------|------------|-------------|------|-------------------|
|                |            | Ru          | L    | acac <sup>-</sup> |
| $\alpha$ -spin |            |             |      |                   |
| HOMO-5         | -11.753    | 0.08        | 0.03 | 0.90              |
| HOMO-4         | -11.693    | 0.07        | 0.03 | 0.90              |
| SOMO4          | -11.505    | 0.09        | 0.28 | 0.62              |
| SOMO3          | -11.415    | 0.11        | 0.28 | 0.61              |
| SOMO2          | -11.271    | 0.18        | 0.57 | 0.25              |
| SOMO1          | -11.217    | 0.18        | 0.56 | 0.26              |
| LUMO           | -7.725     | 0.08        | 0.89 | 0.03              |
| LUMO+1         | -7.310     | 0.12        | 0.83 | 0.06              |
| LUMO+2         | -6.789     | 0.51        | 0.24 | 0.25              |
| LUMO+3         | -6.720     | 0.48        | 0.09 | 0.44              |
| LUMO+4         | -6.630     | 0.43        | 0.08 | 0.49              |
| LUMO+5         | -6.554     | 0.48        | 0.22 | 0.30              |
| $\beta$ -spin  |            |             |      |                   |
| HOMO-5         | -11.781    | 0.62        | 0.16 | 0.22              |
| HOMO-4         | -11.692    | 0.63        | 0.15 | 0.22              |
| HOMO-3         | -11.534    | 0.26        | 0.18 | 0.57              |
| HOMO-2         | -11.486    | 0.25        | 0.22 | 0.54              |
| HOMO-1         | -11.238    | 0.11        | 0.45 | 0.44              |
| HOMO           | -11.188    | 0.11        | 0.41 | 0.48              |
| LUMO           | -9.480     | 0.60        | 0.19 | 0.21              |
| LUMO+1         | -9.353     | 0.60        | 0.21 | 0.20              |
| LUMO+2         | -9.158     | 0.55        | 0.18 | 0.26              |
| LUMO+3         | -9.072     | 0.56        | 0.16 | 0.28              |
| LUMO+4         | -7.561     | 0.09        | 0.89 | 0.02              |
| LUMO+5         | -7.167     | 0.07        | 0.90 | 0.02              |

| $\alpha$ -spin                                                                      |                                                                                     |                                                                                      |                                                                                       |
|-------------------------------------------------------------------------------------|-------------------------------------------------------------------------------------|--------------------------------------------------------------------------------------|---------------------------------------------------------------------------------------|
| 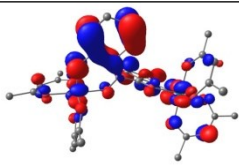   |    |    |    |
| SOMO1                                                                               | SOMO2                                                                               | SOMO3                                                                                | SOMO4                                                                                 |
|    |    |    |    |
| LUMO                                                                                | LUMO+1                                                                              | LUMO+2                                                                               | LUMO+3                                                                                |
| $\beta$ -spin                                                                       |                                                                                     |                                                                                      |                                                                                       |
|   |   |   |   |
| HOMO                                                                                | HOMO-1                                                                              | HOMO-2                                                                               | HOMO-3                                                                                |
|  |  |  |  |
| LUMO                                                                                | LUMO+1                                                                              | LUMO+2                                                                               | LUMO+3                                                                                |

**Table S11** Composition and energies of selected molecular orbitals of **1a<sup>-</sup>(rac)** (*S*=1/2)

| MO             | Energy(eV) | Composition |      |                   |
|----------------|------------|-------------|------|-------------------|
|                |            | Ru          | L    | acac <sup>-</sup> |
| $\alpha$ -spin |            |             |      |                   |
| HOMO-5         | -2.941     | 0.28        | 0.42 | 0.30              |
| HOMO-4         | -2.938     | 0.18        | 0.21 | 0.61              |
| HOMO-3         | -2.672     | 0.09        | 0.67 | 0.24              |
| HOMO-2         | -1.545     | 0.73        | 0.10 | 0.17              |
| HOMO-1         | -1.497     | 0.72        | 0.11 | 0.18              |
| SOMO           | -0.957     | 0.64        | 0.17 | 0.19              |
| LUMO           | 0.790      | 0.05        | 0.94 | 0.01              |
| LUMO+1         | 1.139      | 0.02        | 0.02 | 0.96              |
| LUMO+2         | 1.224      | 0.06        | 0.01 | 0.93              |
| LUMO+3         | 1.481      | 0.10        | 0.86 | 0.86              |
| LUMO+4         | 2.245      | 0.09        | 0.04 | 0.87              |
| LUMO+5         | 2.251      | 0.47        | 0.11 | 0.47              |
| $\beta$ -spin  |            |             |      |                   |
| HOMO-5         | -2.905     | 0.07        | 0.04 | 0.89              |
| HOMO-4         | -2.851     | 0.58        | 0.22 | 0.20              |
| HOMO-3         | -2.648     | 0.07        | 0.72 | 0.21              |
| HOMO-2         | -1.472     | 0.73        | 0.11 | 0.16              |
| HOMO-1         | -1.057     | 0.72        | 0.10 | 0.18              |
| HOMO           | -0.891     | 0.65        | 0.17 | 0.18              |
| LUMO           | -0.593     | 0.68        | 0.15 | 0.17              |
| LUMO+1         | 0.828      | 0.07        | 0.90 | 0.03              |
| LUMO+2         | 1.169      | 0.03        | 0.02 | 0.94              |
| LUMO+3         | 1.255      | 0.06        | 0.01 | 0.92              |
| LUMO+4         | 1.497      | 0.09        | 0.88 | 0.03              |
| LUMO+5         | 2.255      | 0.04        | 0.02 | 0.94              |

| $\alpha$ -spin                                                                      |                                                                                     |                                                                                      |                                                                                       |
|-------------------------------------------------------------------------------------|-------------------------------------------------------------------------------------|--------------------------------------------------------------------------------------|---------------------------------------------------------------------------------------|
| 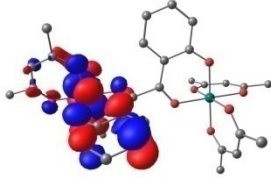   |    |    |    |
| SOMO                                                                                | HOMO-1                                                                              | HOMO-2                                                                               | HOMO-3                                                                                |
|    |    |    |    |
| LUMO                                                                                | LUMO+1                                                                              | LUMO+2                                                                               | LUMO+3                                                                                |
| $\beta$ -spin                                                                       |                                                                                     |                                                                                      |                                                                                       |
|   |   |   |   |
| HOMO                                                                                | HOMO-1                                                                              | HOMO-2                                                                               | HOMO-3                                                                                |
|  |  |  |  |
| LUMO                                                                                | LUMO+1                                                                              | LUMO+2                                                                               | LUMO+3                                                                                |



**Table S12** Composition and energies of selected molecular orbitals of **1a<sup>2-</sup>(rac)** (*S*=0)

| MO     | Energy(eV) | Composition |      |                   |
|--------|------------|-------------|------|-------------------|
|        |            | Ru          | L    | acac <sup>-</sup> |
| HOMO-5 | 0.791      | 0.74        | 0.10 | 0.16              |
| HOMO-4 | 0.896      | 0.75        | 0.09 | 0.16              |
| HOMO-3 | 1.016      | 0.73        | 0.10 | 0.17              |
| HOMO-2 | 1.083      | 0.73        | 0.10 | 0.17              |
| HOMO-1 | 1.229      | 0.69        | 0.16 | 0.15              |
| HOMO   | 1.361      | 0.68        | 0.17 | 0.16              |
| LUMO   | 3.803      | 0.08        | 0.89 | 0.03              |
| LUMO+1 | 4.128      | 0.04        | 0.92 | 0.03              |
| LUMO+2 | 4.372      | 0.04        | 0.01 | 0.95              |
| LUMO+3 | 4.462      | 0.03        | 0.02 | 0.95              |
| LUMO+4 | 4.584      | 0.07        | 0.01 | 0.92              |
| LUMO+5 | 4.606      | 0.08        | 0.03 | 0.89              |

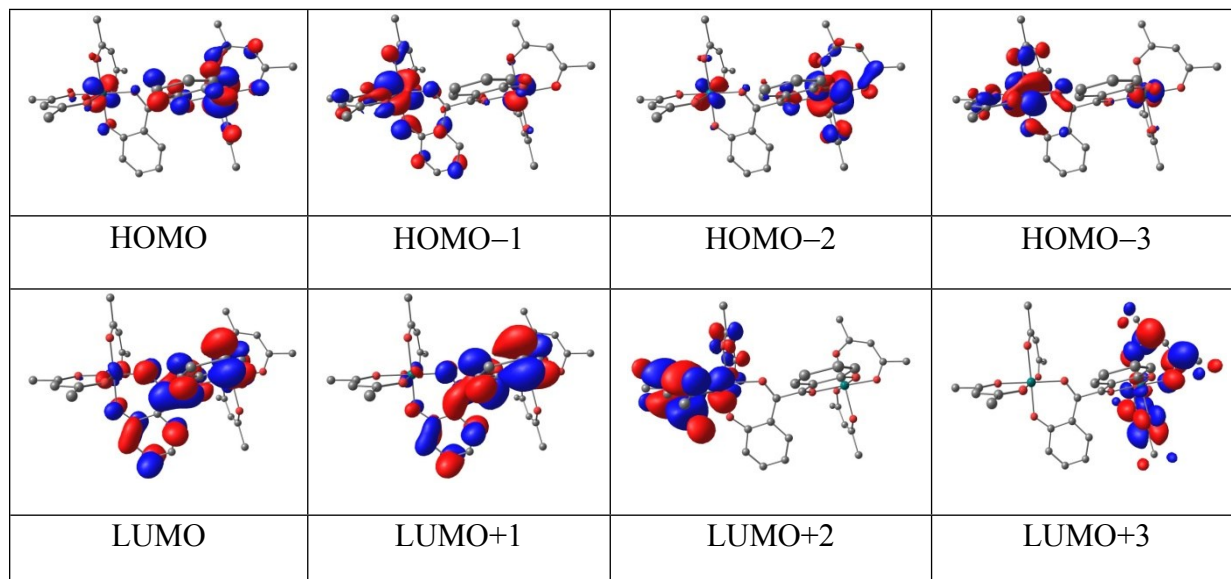

**Table S13** Composition and energies of selected molecular orbitals of  $2^{2+}$  ( $S=0$ )

| MO     | Energy(eV) | Composition |      |      |
|--------|------------|-------------|------|------|
|        |            | Ru          | L    | bpy  |
| HOMO-5 | -9.975     | 0.72        | 0.13 | 0.15 |
| HOMO-4 | -9.881     | 0.60        | 0.14 | 0.26 |
| HOMO-3 | -9.628     | 0.68        | 0.12 | 0.20 |
| HOMO-2 | -9.574     | 0.65        | 0.15 | 0.20 |
| HOMO-1 | -9.327     | 0.39        | 0.47 | 0.15 |
| HOMO   | -8.965     | 0.19        | 0.71 | 0.09 |
| LUMO   | -7.354     | 0.11        | 0.02 | 0.86 |
| LUMO+1 | -6.833     | 0.11        | 0.02 | 0.86 |
| LUMO+2 | -6.636     | 0.07        | 0.04 | 0.89 |
| LUMO+3 | -6.318     | 0.05        | 0.83 | 0.11 |
| LUMO+4 | -6.244     | 0.07        | 0.04 | 0.90 |
| LUMO+5 | -5.718     | 0.03        | 0.07 | 0.91 |

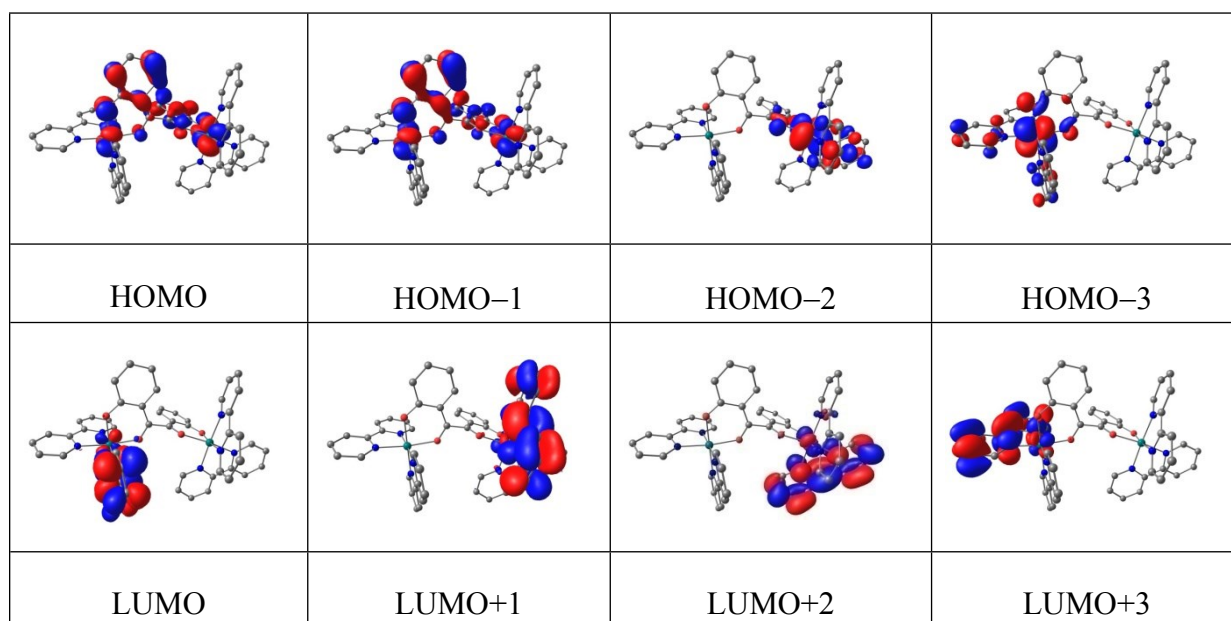

**Table S14** Composition and energies of selected molecular orbitals of  $2^{3+}$  ( $S=1/2$ )

| MO             | Energy(eV) | Composition |      |      |
|----------------|------------|-------------|------|------|
|                |            | Ru          | L    | bpy  |
| $\alpha$ -spin |            |             |      |      |
| HOMO-5         | -12.918    | 0.57        | 0.11 | 0.33 |
| HOMO-4         | -12.665    | 0.68        | 0.14 | 0.19 |
| HOMO-3         | -12.635    | 0.69        | 0.10 | 0.21 |
| HOMO-2         | -12.535    | 0.30        | 0.59 | 0.10 |
| HOMO-1         | -12.230    | 0.67        | 0.12 | 0.22 |
| SOMO           | -12.086    | 0.34        | 0.56 | 0.10 |
| LUMO           | -10.003    | 0.07        | 0.01 | 0.92 |
| LUMO+1         | -9.274     | 0.09        | 0.06 | 0.86 |
| LUMO+2         | -9.013     | 0.05        | 0.80 | 0.15 |
| LUMO+3         | -8.817     | 0.06        | 0.13 | 0.81 |
| LUMO+4         | -8.748     | 0.06        | 0.62 | 0.32 |
| LUMO+5         | -8.640     | 0.06        | 0.23 | 0.71 |
| $\beta$ -spin  |            |             |      |      |
| HOMO-5         | -12.790    | 0.51        | 0.34 | 0.15 |
| HOMO-4         | -12.597    | 0.49        | 0.25 | 0.26 |
| HOMO-3         | -12.547    | 0.68        | 0.13 | 0.18 |
| HOMO-2         | -12.513    | 0.67        | 0.17 | 0.16 |
| HOMO-1         | -12.091    | 0.60        | 0.22 | 0.18 |
| HOMO           | -11.582    | 0.43        | 0.38 | 0.19 |
| LUMO           | -11.063    | 0.37        | 0.47 | 0.16 |
| LUMO+1         | -9.962     | 0.12        | 0.03 | 0.85 |
| LUMO+2         | -9.222     | 0.14        | 0.05 | 0.82 |
| LUMO+3         | -8.994     | 0.05        | 0.80 | 0.15 |
| LUMO+4         | -8.807     | 0.06        | 0.11 | 0.83 |
| LUMO+5         | 8.705      | 0.06        | 0.40 | 0.54 |

| $\alpha$ -spin                                                                      |                                                                                     |                                                                                      |                                                                                       |
|-------------------------------------------------------------------------------------|-------------------------------------------------------------------------------------|--------------------------------------------------------------------------------------|---------------------------------------------------------------------------------------|
| 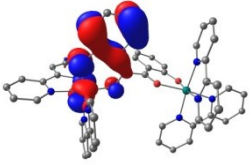   |    |    |    |
| SOMO                                                                                | HOMO-1                                                                              | HOMO-2                                                                               | HOMO-3                                                                                |
|    |    |    |    |
| LUMO                                                                                | LUMO+1                                                                              | LUMO+2                                                                               | LUMO+3                                                                                |
| $\beta$ -spin                                                                       |                                                                                     |                                                                                      |                                                                                       |
|   |   |   |   |
| HOMO                                                                                | HOMO-1                                                                              | HOMO-2                                                                               | HOMO-3                                                                                |
|  |  |  |  |
| LUMO                                                                                | LUMO+1                                                                              | LUMO+2                                                                               | LUMO+3                                                                                |

**Table S15** Composition and energies of selected molecular orbitals of  $2^{4+}$  ( $S=1$ )

| MO             | Energy(eV) | Composition |      |      |
|----------------|------------|-------------|------|------|
|                |            | Ru          | L    | bpy  |
| $\alpha$ -spin |            |             |      |      |
| HOMO-5         | -15.573    | 0.09        | 0.02 | 0.89 |
| HOMO-4         | -15.497    | 0.11        | 0.03 | 0.85 |
| HOMO-3         | -15.472    | 0.60        | 0.12 | 0.28 |
| HOMO-2         | -15.361    | 0.63        | 0.12 | 0.26 |
| SOMO2          | -14.937    | 0.15        | 0.80 | 0.05 |
| SOMO1          | -14.908    | 0.14        | 0.81 | 0.05 |
| LUMO           | -11.202    | 0.05        | 0.84 | 0.10 |
| LUMO+1         | -11.178    | 0.05        | 0.86 | 0.09 |
| LUMO+2         | -11.006    | 0.04        | 0.07 | 0.89 |
| LUMO+3         | -10.957    | 0.04        | 0.05 | 0.91 |
| LUMO+4         | -10.830    | 0.04        | 0.01 | 0.95 |
| LUMO+5         | -10.747    | 0.04        | 0.01 | 0.95 |
| $\beta$ -spin  |            |             |      |      |
| HOMO-5         | -15.500    | 0.05        | 0.02 | 0.93 |
| HOMO-4         | -15.469    | 0.67        | 0.18 | 0.16 |
| HOMO-3         | -15.393    | 0.61        | 0.20 | 0.18 |
| HOMO-2         | -15.253    | 0.60        | 0.25 | 0.15 |
| HOMO-1         | -14.893    | 0.46        | 0.44 | 0.11 |
| HOMO           | -14.544    | 0.39        | 0.51 | 0.10 |
| LUMO           | -12.985    | 0.58        | 0.31 | 0.11 |
| LUMO+1         | -12.955    | 0.60        | 0.29 | 0.11 |
| LUMO+2         | -11.112    | 0.06        | 0.78 | 0.16 |
| LUMO+3         | -11.078    | 0.05        | 0.84 | 0.11 |
| LUMO+4         | -10.980    | 0.05        | 0.11 | 0.84 |
| LUMO+5         | -10.917    | 0.05        | 0.07 | 0.88 |

| $\alpha$ -spin                                                                      |                                                                                     |                                                                                      |                                                                                       |
|-------------------------------------------------------------------------------------|-------------------------------------------------------------------------------------|--------------------------------------------------------------------------------------|---------------------------------------------------------------------------------------|
| 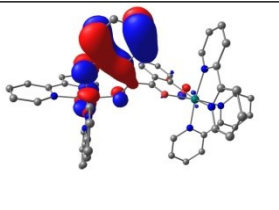   |    |    |    |
| SOMO1                                                                               | SOMO2                                                                               | HOMO-2                                                                               | HOMO-3                                                                                |
|    |    |    |    |
| LUMO                                                                                | LUMO+1                                                                              | LUMO+2                                                                               | LUMO+3                                                                                |
| $\beta$ -spin                                                                       |                                                                                     |                                                                                      |                                                                                       |
|   |   |   |   |
| HOMO                                                                                | HOMO-1                                                                              | HOMO-2                                                                               | HOMO-3                                                                                |
|  |  |  |  |
| LUMO                                                                                | LUMO+1                                                                              | LUMO+2                                                                               | LUMO+3                                                                                |

**Table S16** Composition and energies of selected molecular orbitals of **2<sup>+</sup>** (*S*=1/2)

| MO             | Energy(eV) | Composition |      |      |
|----------------|------------|-------------|------|------|
|                |            | Ru          | L    | bpy  |
| $\alpha$ -spin |            |             |      |      |
| HOMO-5         | -7.255     | 0.65        | 0.16 | 0.20 |
| HOMO-4         | -7.074     | 0.50        | 0.33 | 0.17 |
| HOMO-3         | -7.047     | 0.56        | 0.19 | 0.25 |
| HOMO-2         | -6.740     | 0.68        | 0.08 | 0.24 |
| HOMO-1         | -6.395     | 0.34        | 0.55 | 0.11 |
| SOMO           | -5.147     | 0.10        | 0.02 | 0.88 |
| LUMO           | -4.587     | 0.08        | 0.01 | 0.91 |
| LUMO+1         | -4.481     | 0.10        | 0.04 | 0.86 |
| LUMO+2         | -4.068     | 0.05        | 0.86 | 0.09 |
| LUMO+3         | -3.800     | 0.08        | 0.02 | 0.90 |
| LUMO+4         | -3.265     | 0.05        | 0.05 | 0.90 |
| LUMO+5         | -3.076     | 0.08        | 0.79 | 0.13 |
| $\beta$ -spin  |            |             |      |      |
| HOMO-5         | -7.294     | 0.64        | 0.20 | 0.17 |
| HOMO-4         | -7.238     | 0.63        | 0.17 | 0.20 |
| HOMO-3         | -7.021     | 0.48        | 0.36 | 0.16 |
| HOMO-2         | -6.906     | 0.56        | 0.19 | 0.26 |
| HOMO-1         | -6.584     | 0.53        | 0.08 | 0.40 |
| HOMO           | -6.339     | 0.39        | 0.48 | 0.13 |
| LUMO           | -4.504     | 0.07        | 0.02 | 0.91 |
| LUMO+1         | -4.290     | 0.11        | 0.09 | 0.81 |
| LUMO+2         | -4.055     | 0.06        | 0.81 | 0.13 |
| LUMO+3         | -3.825     | 0.07        | 0.01 | 0.92 |
| LUMO+4         | -3.724     | 0.08        | 0.04 | 0.88 |
| LUMO+5         | -3.262     | 0.05        | 0.05 | 0.90 |

| $\alpha$ -spin                                                                      |                                                                                     |                                                                                      |                                                                                       |
|-------------------------------------------------------------------------------------|-------------------------------------------------------------------------------------|--------------------------------------------------------------------------------------|---------------------------------------------------------------------------------------|
| 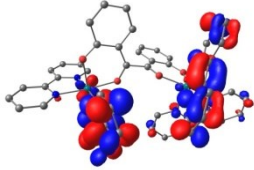   |    |    |    |
| SOMO                                                                                | HOMO-1                                                                              | HOMO-2                                                                               | HOMO-3                                                                                |
|    |    |    |    |
| LUMO                                                                                | LUMO+1                                                                              | LUMO+2                                                                               | LUMO+3                                                                                |
| $\beta$ -spin                                                                       |                                                                                     |                                                                                      |                                                                                       |
|   |   |   |   |
| HOMO                                                                                | HOMO-1                                                                              | HOMO-2                                                                               | HOMO-3                                                                                |
|  |  |  |  |
| LUMO                                                                                | LUMO+1                                                                              | LUMO+2                                                                               | LUMO+3                                                                                |



**Table S17** Composition and energies of selected molecular orbitals of **2** ( $S=1$ )

| MO             | Energy(eV) | Composition |      |      |
|----------------|------------|-------------|------|------|
|                |            | Ru          | L    | bpy  |
| $\alpha$ -spin |            |             |      |      |
| HOMO-5         | -4.626     | 0.70        | 0.14 | 0.17 |
| HOMO-4         | -4.506     | 0.63        | 0.26 | 0.11 |
| HOMO-3         | -4.498     | 0.69        | 0.17 | 0.13 |
| HOMO-2         | -4.450     | 0.57        | 0.31 | 0.12 |
| SOMO2          | -2.454     | 0.05        | 0.01 | 0.94 |
| SOMO1          | -2.282     | 0.05        | 0.01 | 0.94 |
| LUMO           | -1.792     | 0.09        | 0.02 | 0.89 |
| LUMO+1         | -1.648     | 0.09        | 0.03 | 0.88 |
| LUMO+2         | -1.262     | 0.06        | 0.85 | 0.09 |
| LUMO+3         | -1.156     | 0.05        | 0.89 | 0.07 |
| LUMO+4         | -0.758     | 0.04        | 0.04 | 0.92 |
| LUMO+5         | -0.586     | 0.03        | 0.02 | 0.96 |
| $\beta$ -spin  |            |             |      |      |
| HOMO-5         | -4.966     | 0.78        | 0.08 | 0.14 |
| HOMO-4         | -4.880     | 0.78        | 0.08 | 0.14 |
| HOMO-3         | -4.637     | 0.73        | 0.11 | 0.16 |
| HOMO-2         | -4.514     | 0.76        | 0.10 | 0.14 |
| HOMO-1         | -4.454     | 0.59        | 0.31 | 0.10 |
| HOMO           | -4.399     | 0.58        | 0.31 | 0.11 |
| LUMO           | -1.458     | 0.06        | 0.02 | 0.91 |
| LUMO+1         | -1.297     | 0.05        | 0.25 | 0.70 |
| LUMO+2         | -1.278     | 0.06        | 0.60 | 0.34 |
| LUMO+3         | -1.203     | 0.04        | 0.53 | 0.43 |
| LUMO+4         | -1.087     | 0.06        | 0.39 | 0.54 |
| LUMO+5         | -1.013     | 0.06        | 0.07 | 0.87 |

| $\alpha$ -spin                                                                      |                                                                                     |                                                                                      |                                                                                       |
|-------------------------------------------------------------------------------------|-------------------------------------------------------------------------------------|--------------------------------------------------------------------------------------|---------------------------------------------------------------------------------------|
| 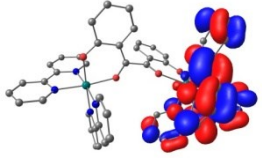   |    |    |    |
| SOMO1                                                                               | SOMO2                                                                               | HOMO-2                                                                               | HOMO-3                                                                                |
|    |    |    |    |
| LUMO                                                                                | LUMO+1                                                                              | LUMO+2                                                                               | LUMO+3                                                                                |
| $\beta$ -spin                                                                       |                                                                                     |                                                                                      |                                                                                       |
|   |   |   |   |
| HOMO                                                                                | HOMO-1                                                                              | HOMO-2                                                                               | HOMO-3                                                                                |
|  |  |  |  |
| LUMO                                                                                | LUMO+1                                                                              | LUMO+2                                                                               | LUMO+3                                                                                |

**Table S18** Composition and energies of selected molecular orbitals of  $2^-$  ( $S=3/2$ )

| MO             | Energy(eV) | Composition |      |      |
|----------------|------------|-------------|------|------|
|                |            | Ru          | L    | bpy  |
| $\alpha$ -spin |            |             |      |      |
| HOMO-5         | -2.181     | 0.71        | 0.14 | 0.15 |
| HOMO-4         | -2.131     | 0.65        | 0.24 | 0.11 |
| HOMO-3         | -2.048     | 0.66        | 0.23 | 0.11 |
| SOMO3          | -0.296     | 0.04        | 0.01 | 0.95 |
| SOMO2          | -0.257     | 0.04        | 0.01 | 0.95 |
| SOMO1          | -0.019     | 0.10        | 0.03 | 0.86 |
| LUMO           | 0.353      | 0.10        | 0.03 | 0.87 |
| LUMO+1         | 1.030      | 0.06        | 0.86 | 0.08 |
| LUMO+2         | 1.060      | 0.05        | 0.89 | 0.06 |
| LUMO+3         | 1.725      | 0.04        | 0.01 | 0.95 |
| LUMO+4         | 1.811      | 0.04        | 0.03 | 0.93 |
| LUMO+5         | 1.936      | 0.05        | 0.01 | 0.94 |
| $\beta$ -spin  |            |             |      |      |
| HOMO-5         | -2.509     | 0.78        | 0.06 | 0.16 |
| HOMO-4         | -2.412     | 0.78        | 0.07 | 0.15 |
| HOMO-3         | -2.148     | 0.71        | 0.12 | 0.16 |
| HOMO-2         | -2.087     | 0.67        | 0.20 | 0.13 |
| HOMO-1         | -2.064     | 0.70        | 0.15 | 0.15 |
| HOMO           | -1.985     | 0.66        | 0.21 | 0.12 |
| LUMO           | 1.023      | 0.05        | 0.13 | 0.82 |
| LUMO+1         | 1.026      | 0.05        | 0.77 | 0.19 |
| LUMO+2         | 1.041      | 0.03        | 0.71 | 0.26 |
| LUMO+3         | 1.146      | 0.05        | 0.08 | 0.87 |
| LUMO+4         | 1.254      | 0.09        | 0.12 | 0.80 |
| LUMO+5         | 1.323      | 0.07        | 0.07 | 0.84 |

| $\alpha$ -spin                                                                      |                                                                                     |                                                                                      |                                                                                       |
|-------------------------------------------------------------------------------------|-------------------------------------------------------------------------------------|--------------------------------------------------------------------------------------|---------------------------------------------------------------------------------------|
| 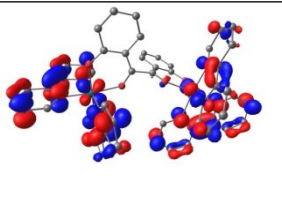   |    |    |    |
| SOMO1                                                                               | SOMO2                                                                               | SOMO3                                                                                | HOMO-3                                                                                |
|    |    |    |    |
| LUMO                                                                                | LUMO+1                                                                              | LUMO+2                                                                               | LUMO+3                                                                                |
| $\beta$ -spin                                                                       |                                                                                     |                                                                                      |                                                                                       |
|   |   |   |   |
| HOMO                                                                                | HOMO-1                                                                              | HOMO-2                                                                               | HOMO-3                                                                                |
|  |  |  |  |
| LUMO                                                                                | LUMO+1                                                                              | LUMO+2                                                                               | LUMO+3                                                                                |

**Table S19** Composition and energies of selected molecular orbitals of  $3^{2+}$  ( $S=0$ )

| MO     | Energy(eV) | Composition |      |      |
|--------|------------|-------------|------|------|
|        |            | Ru          | L    | pap  |
| HOMO-5 | -10.757    | 0.41        | 0.11 | 0.48 |
| HOMO-4 | -10.744    | 0.43        | 0.10 | 0.48 |
| HOMO-3 | -10.550    | 0.54        | 0.12 | 0.34 |
| HOMO-2 | -10.542    | 0.54        | 0.13 | 0.33 |
| HOMO-1 | -9.983     | 0.23        | 0.68 | 0.09 |
| HOMO   | -9.956     | 0.24        | 0.67 | 0.09 |
| LUMO   | -7.526     | 0.12        | 0.03 | 0.85 |
| LUMO+1 | -7.513     | 0.12        | 0.02 | 0.86 |
| LUMO+2 | -7.178     | 0.20        | 0.03 | 0.77 |
| LUMO+3 | -7.177     | 0.19        | 0.03 | 0.77 |
| LUMO+4 | -6.461     | 0.05        | 0.88 | 0.07 |
| LUMO+5 | -6.458     | 0.05        | 0.88 | 0.07 |

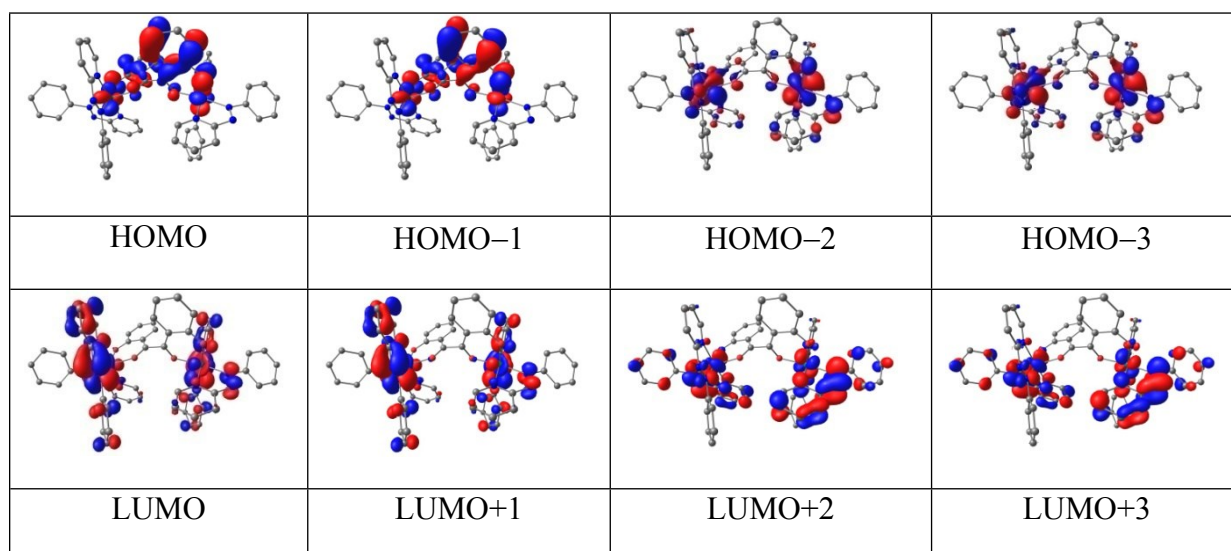

**Table S20** Composition and energies of selected molecular orbitals of  $3^{3+}$  ( $S=1/2$ )

| MO             | Energy(eV) | Composition |      |      |
|----------------|------------|-------------|------|------|
|                |            | Ru          | L    | pap  |
| $\alpha$ -spin |            |             |      |      |
| HOMO-5         | -12.877    | 0.01        | 0.01 | 0.98 |
| HOMO-4         | -12.876    | 0.01        | 0.01 | 0.99 |
| HOMO-3         | -12.763    | 0.25        | 0.52 | 0.23 |
| HOMO-2         | -12.754    | 0.09        | 0.07 | 0.83 |
| HOMO-1         | -12.750    | 0.31        | 0.57 | 0.12 |
| SOMO           | -12.738    | 0.16        | 0.15 | 0.69 |
| LUMO           | -9.733     | 0.08        | 0.03 | 0.89 |
| LUMO+1         | -9.713     | 0.08        | 0.01 | 0.91 |
| LUMO+2         | -9.503     | 0.12        | 0.02 | 0.86 |
| LUMO+3         | -9.501     | 0.12        | 0.02 | 0.86 |
| LUMO+4         | -9.110     | 0.05        | 0.89 | 0.06 |
| LUMO+5         | -8.975     | 0.05        | 0.89 | 0.06 |
| $\beta$ -spin  |            |             |      |      |
| HOMO-5         | -12.932    | 0.58        | 0.11 | 0.32 |
| HOMO-4         | -12.875    | 0.01        | 0.00 | 0.98 |
| HOMO-3         | -12.873    | 0.03        | 0.01 | 0.96 |
| HOMO-2         | -12.744    | 0.14        | 0.02 | 0.84 |
| HOMO-1         | -12.735    | 0.13        | 0.02 | 0.84 |
| HOMO           | -12.034    | 0.40        | 0.51 | 0.09 |
| LUMO           | -11.548    | 0.39        | 0.52 | 0.09 |
| LUMO+1         | -9.711     | 0.11        | 0.02 | 0.87 |
| LUMO+2         | -9.695     | 0.10        | 0.02 | 0.88 |
| LUMO+3         | -9.488     | 0.13        | 0.02 | 0.85 |
| LUMO+4         | -9.487     | 0.13        | 0.02 | 0.85 |
| LUMO+5         | -9.052     | 0.05        | 0.88 | 0.06 |

| $\alpha$ -spin                                                                      |                                                                                     |                                                                                      |                                                                                       |
|-------------------------------------------------------------------------------------|-------------------------------------------------------------------------------------|--------------------------------------------------------------------------------------|---------------------------------------------------------------------------------------|
| 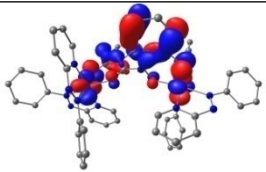   |    |    |    |
| SOMO                                                                                | HOMO-1                                                                              | HOMO-2                                                                               | HOMO-3                                                                                |
|    |    |    |    |
| LUMO                                                                                | LUMO+1                                                                              | LUMO+2                                                                               | LUMO+3                                                                                |
| $\beta$ -spin                                                                       |                                                                                     |                                                                                      |                                                                                       |
|   |   |   |   |
| HOMO                                                                                | HOMO-1                                                                              | HOMO-2                                                                               | HOMO-3                                                                                |
|  |  |  |  |
| LUMO                                                                                | LUMO+1                                                                              | LUMO+2                                                                               | LUMO+3                                                                                |

**Table S21** Composition and energies of selected molecular orbitals of  $3^+$  ( $S=1/2$ )

| MO             | Energy(eV) | Composition |      |      |
|----------------|------------|-------------|------|------|
|                |            | Ru          | L    | pap  |
| $\alpha$ -spin |            |             |      |      |
| HOMO-5         | -8.118     | 0.68        | 0.09 | 0.23 |
| HOMO-4         | -7.835     | 0.64        | 0.11 | 0.25 |
| HOMO-3         | -7.819     | 0.64        | 0.12 | 0.25 |
| HOMO-2         | -7.428     | 0.35        | 0.57 | 0.08 |
| HOMO-1         | -7.411     | 0.35        | 0.57 | 0.08 |
| SOMO           | -5.610     | 0.09        | 0.02 | 0.89 |
| LUMO           | -5.265     | 0.09        | 0.01 | 0.90 |
| LUMO+1         | -4.857     | 0.20        | 0.02 | 0.77 |
| LUMO+2         | -4.846     | 0.20        | 0.03 | 0.77 |
| LUMO+3         | -3.992     | 0.05        | 0.88 | 0.07 |
| LUMO+4         | -3.866     | 0.05        | 0.89 | 0.06 |
| LUMO+5         | -3.182     | 0.05        | 0.01 | 0.94 |
| $\beta$ -spin  |            |             |      |      |
| HOMO-5         | -8.126     | 0.67        | 0.13 | 0.20 |
| HOMO-4         | -8.113     | 0.68        | 0.10 | 0.22 |
| HOMO-3         | -7.868     | 0.65        | 0.11 | 0.25 |
| HOMO-2         | -7.853     | 0.65        | 0.11 | 0.24 |
| HOMO-1         | -7.407     | 0.36        | 0.55 | 0.08 |
| HOMO           | -7.389     | 0.37        | 0.55 | 0.08 |
| LUMO           | -4.745     | 0.11        | 0.02 | 0.87 |
| LUMO+1         | -4.738     | 0.11        | 0.01 | 0.88 |
| LUMO+2         | -4.561     | 0.13        | 0.03 | 0.84 |
| LUMO+3         | -4.550     | 0.12        | 0.02 | 0.86 |
| LUMO+4         | -3.990     | 0.05        | 0.88 | 0.07 |
| LUMO+5         | -3.859     | 0.05        | 0.88 | 0.07 |



| $\alpha$ -spin                                                                      |                                                                                     |                                                                                      |                                                                                       |
|-------------------------------------------------------------------------------------|-------------------------------------------------------------------------------------|--------------------------------------------------------------------------------------|---------------------------------------------------------------------------------------|
| 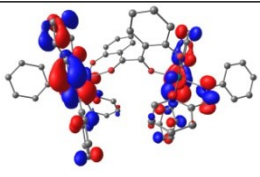   |    |    |    |
| SOMO                                                                                | HOMO-1                                                                              | HOMO-2                                                                               | HOMO-3                                                                                |
|    |    |    |    |
| LUMO                                                                                | LUMO+1                                                                              | LUMO+2                                                                               | LUMO+3                                                                                |
| $\beta$ -spin                                                                       |                                                                                     |                                                                                      |                                                                                       |
|   |   |   |   |
| HOMO                                                                                | HOMO-1                                                                              | HOMO-2                                                                               | HOMO-3                                                                                |
|  |  |  |  |
| LUMO                                                                                | LUMO+1                                                                              | LUMO+2                                                                               | LUMO+3                                                                                |

**Table S22** Composition and energies of selected molecular orbitals of **3** ( $S=1$ )

| MO             | Energy(eV) | Composition |      |      |
|----------------|------------|-------------|------|------|
|                |            | Ru          | L    | pap  |
| $\alpha$ -spin |            |             |      |      |
| HOMO-5         | -5.386     | 0.59        | 0.09 | 0.32 |
| HOMO-4         | -5.373     | 0.59        | 0.10 | 0.31 |
| HOMO-3         | -5.167     | 0.42        | 0.49 | 0.09 |
| HOMO-2         | -5.145     | 0.43        | 0.48 | 0.09 |
| SOMO2          | -3.674     | 0.09        | 0.02 | 0.90 |
| SOMO1          | -3.653     | 0.08        | 0.01 | 0.90 |
| LUMO           | -2.518     | 0.27        | 0.03 | 0.70 |
| LUMO+1         | -2.513     | 0.27        | 0.03 | 0.70 |
| LUMO+2         | -1.760     | 0.05        | 0.89 | 0.06 |
| LUMO+3         | -1.627     | 0.05        | 0.89 | 0.06 |
| LUMO+4         | -0.878     | 0.05        | 0.01 | 0.93 |
| LUMO+5         | -0.862     | 0.04        | 0.01 | 0.95 |
| $\beta$ -spin  |            |             |      |      |
| HOMO-5         | -5.736     | 0.66        | 0.09 | 0.25 |
| HOMO-4         | -5.726     | 0.68        | 0.08 | 0.24 |
| HOMO-3         | -5.434     | 0.58        | 0.09 | 0.33 |
| HOMO-2         | -5.422     | 0.59        | 0.09 | 0.32 |
| HOMO-1         | -5.136     | 0.45        | 0.46 | 0.09 |
| HOMO           | -5.113     | 0.45        | 0.46 | 0.09 |
| LUMO           | -2.309     | 0.12        | 0.02 | 0.86 |
| LUMO+1         | -2.303     | 0.12        | 0.02 | 0.86 |
| LUMO+2         | -1.966     | 0.10        | 0.08 | 0.82 |
| LUMO+3         | -1.942     | 0.10        | 0.02 | 0.88 |
| LUMO+4         | -1.758     | 0.05        | 0.89 | 0.06 |
| LUMO+5         | -1.607     | 0.05        | 0.84 | 0.11 |

| $\alpha$ -spin                                                                      |                                                                                     |                                                                                      |                                                                                       |
|-------------------------------------------------------------------------------------|-------------------------------------------------------------------------------------|--------------------------------------------------------------------------------------|---------------------------------------------------------------------------------------|
| 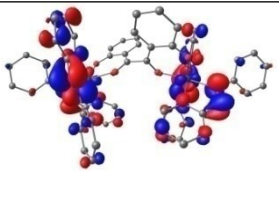   |    |    |    |
| SOMO1                                                                               | SOMO2                                                                               | HOMO-2                                                                               | HOMO-3                                                                                |
|    |    |    |    |
| LUMO                                                                                | LUMO+1                                                                              | LUMO+2                                                                               | LUMO+3                                                                                |
| $\beta$ -spin                                                                       |                                                                                     |                                                                                      |                                                                                       |
|   |   |   |   |
| HOMO                                                                                | HOMO-1                                                                              | HOMO-2                                                                               | HOMO-3                                                                                |
|  |  |  |  |
| LUMO                                                                                | LUMO+1                                                                              | LUMO+2                                                                               | LUMO+3                                                                                |

**Table S23** Energies of DFT ((U)B3LYP/LanL2DZ/6-31G\*) optimised structures of **1<sup>n</sup>**, **2<sup>n</sup>**, **3<sup>n</sup>** and **4<sup>n</sup>**

| Compd                  | $E_{(S=0)}$<br>(Hartrees) | $E_{(S=1/2)}$<br>(Hartrees) | $E_{(S=1)}$<br>(Hartrees) | $E_{(S=3/2)}$<br>(Hartrees) | $E_{(S=2)}$<br>(Hartrees) | $\Delta E_{(HE-LE)}^a$                                                   |
|------------------------|---------------------------|-----------------------------|---------------------------|-----------------------------|---------------------------|--------------------------------------------------------------------------|
| <b>1a</b>              | -2407.8879                |                             | <b>-2407.9351</b>         |                             |                           | 0.0472 Hartrees<br>123.92 kJ mol <sup>-1</sup><br>10359 cm <sup>-1</sup> |
| <b>1a<sup>+</sup></b>  |                           | -2407.7068                  |                           | <b>-2407.7081</b>           |                           | 0.0013 Hartrees<br>3.41 kJ mol <sup>-1</sup><br>285 cm <sup>-1</sup>     |
| <b>1a<sup>2+</sup></b> |                           |                             | -2407.3963                |                             | <b>-2407.4011</b>         | 0.0048 Hartrees<br>12.60 kJ mol <sup>-1</sup><br>1053 cm <sup>-1</sup>   |
| <b>1a<sup>-</sup></b>  |                           | <b>-2408.0066</b>           |                           | -2407.9905                  |                           | 0.0161 Hartrees<br>42.27 kJ mol <sup>-1</sup><br>3533 cm <sup>-1</sup>   |
| <b>1a<sup>2-</sup></b> | <b>-2407.9969</b>         |                             | -2407.9575                |                             |                           | 0.0394 Hartrees<br>103.44 kJ mol <sup>-1</sup><br>8647 cm <sup>-1</sup>  |
| <b>2<sup>4+</sup></b>  | -3007.5050                |                             | <b>-3007.5405</b>         |                             |                           | 0.0355 Hartrees<br>93.20 kJ mol <sup>-1</sup><br>7791 cm <sup>-1</sup>   |
| <b>2</b>               | -3008.6531                |                             | <b>-3008.6660</b>         |                             |                           | 0.0129 Hartrees<br>33.86 kJ mol <sup>-1</sup><br>2831 cm <sup>-1</sup>   |
| <b>2<sup>-</sup></b>   |                           | -3008.6989                  |                           | <b>-3008.7006</b>           |                           | 0.0017 Hartrees<br>4.46 kJ mol <sup>-1</sup><br>373 cm <sup>-1</sup>     |
| <b>3</b>               | -3382.3770                |                             | <b>-3382.3987</b>         |                             |                           | 0.0217 Hartrees<br>56.97 kJ mol <sup>-1</sup><br>4762 cm <sup>-1</sup>   |

**Table S24** Experimental and TD-DFT ((U)B3LYP/CPCM/CH<sub>3</sub>CN or CH<sub>2</sub>Cl<sub>2</sub>) calculated electronic transitions

| $\lambda_{\max}^a$ [nm]<br>expt.( $\lambda_{\text{DFT}}$ ) | $\epsilon/\text{dm}^3 \text{ mol}^{-1}$<br>$\text{cm}^{-1} b(f)^c$ | Transitions                                                                                                          | Character                                                                                                                    |
|------------------------------------------------------------|--------------------------------------------------------------------|----------------------------------------------------------------------------------------------------------------------|------------------------------------------------------------------------------------------------------------------------------|
| <b>1a (S=1)</b>                                            |                                                                    |                                                                                                                      |                                                                                                                              |
| 507(537)                                                   | 6690(0.033)                                                        | HOMO-6( $\beta$ ) $\rightarrow$ LUMO+1( $\beta$ )(0.42)<br>HOMO-6( $\beta$ ) $\rightarrow$ LUMO( $\beta$ )(0.39)     | acac( $\pi$ ) $\rightarrow$ Ru(d $\pi$ )/acac( $\pi^*$ )                                                                     |
| 421(422)                                                   | 19100(0.044)                                                       | HOMO-3( $\beta$ ) $\rightarrow$ LUMO+2( $\beta$ )(0.37)<br>HOMO-2( $\beta$ ) $\rightarrow$ LUMO+2( $\beta$ )(0.33)   | Ru(d $\pi$ )/acac( $\pi$ ) $\rightarrow$ L( $\pi^*$ )                                                                        |
| 343(394)                                                   | 14800(0.044)                                                       | SOMO2 $\rightarrow$ LUMO+1( $\alpha$ )(0.37)<br>HOMO-4( $\beta$ ) $\rightarrow$ LUMO+2( $\beta$ )(0.26)              | L( $\pi$ ) $\rightarrow$ L( $\pi^*$ )<br>L( $\pi$ )/Ru(d $\pi$ ) $\rightarrow$ L( $\pi^*$ )                                  |
| <b>1a<sup>+</sup> (S=3/2)</b>                              |                                                                    |                                                                                                                      |                                                                                                                              |
| 754(799)                                                   | 5500(0.061)                                                        | HOMO-6( $\beta$ ) $\rightarrow$ LUMO+1( $\beta$ )(0.77)                                                              | acac( $\pi$ )/Ru(d $\pi$ ) $\rightarrow$ Ru(d $\pi$ )/acac( $\pi^*$ )                                                        |
| 525(589)                                                   | 8900(0.038)                                                        | HOMO-2( $\beta$ ) $\rightarrow$ LUMO+2( $\beta$ )(0.76)                                                              | L( $\pi$ )/acac( $\pi$ ) $\rightarrow$ Ru(d $\pi$ )/acac( $\pi^*$ )                                                          |
| 424(469)                                                   | 16258(0.019)                                                       | SOMO3 $\rightarrow$ LUMO( $\alpha$ )(0.70)                                                                           | acac( $\pi$ )/Ru(d $\pi$ ) $\rightarrow$ L( $\pi^*$ )                                                                        |
| 344(384)                                                   | 16650(0.017)                                                       | HOMO-3( $\beta$ ) $\rightarrow$ LUMO+3( $\beta$ )(0.35)<br>SOMO3 $\rightarrow$ LUMO+1( $\alpha$ )(0.26)              | Ru(d $\pi$ ) $\rightarrow$ L( $\pi^*$ )<br>acac( $\pi$ )/Ru(d $\pi$ ) $\rightarrow$ L( $\pi^*$ )                             |
| (347)                                                      | (0.011)                                                            | HOMO-7( $\beta$ ) $\rightarrow$ LUMO+2( $\beta$ )(0.67)                                                              | acac( $\pi$ )/Ru(d $\pi$ ) $\rightarrow$ Ru(d $\pi$ )/acac( $\pi^*$ )                                                        |
| <b>1a<sup>+</sup> (S=1/2)</b>                              |                                                                    |                                                                                                                      |                                                                                                                              |
| 798(799)                                                   | 5500(0.066)                                                        | HOMO-6( $\beta$ ) $\rightarrow$ LUMO( $\beta$ )(0.81)                                                                | acac( $\pi$ )/L( $\pi$ )/Ru(d $\pi$ ) $\rightarrow$ Ru(d $\pi$ )/L( $\pi^*$ )                                                |
| 525(589)                                                   | 8900(0.043)                                                        | HOMO-2( $\alpha$ ) $\rightarrow$ LUMO( $\alpha$ )(0.82)                                                              | acac( $\pi$ ) $\rightarrow$ Ru(d $\pi$ )/acac( $\pi^*$ )                                                                     |
| 424(438)                                                   | 16258(0.016)                                                       | HOMO-2( $\alpha$ ) $\rightarrow$ LUMO+1( $\alpha$ )(0.56)                                                            | acac( $\pi$ ) $\rightarrow$ L( $\pi^*$ )                                                                                     |
| 344(384)                                                   | 16650(0.03)                                                        | HOMO-16( $\beta$ ) $\rightarrow$ LUMO+1( $\beta$ )(0.41)<br>HOMO-4( $\beta$ ) $\rightarrow$ LUMO+1( $\beta$ )(0.30)  | acac( $\pi$ ) $\rightarrow$ Ru(d $\pi$ )<br>acac( $\pi$ )/Ru(d $\pi$ ) $\rightarrow$ Ru(d $\pi$ )                            |
| <b>1a<sup>2+</sup> (S=2)</b>                               |                                                                    |                                                                                                                      |                                                                                                                              |
| 750(805)                                                   | 13480(0.024)                                                       | HOMO-2( $\beta$ ) $\rightarrow$ LUMO+3( $\beta$ )(0.55)                                                              | acac( $\pi$ )/Ru(d $\pi$ )/L( $\pi$ ) $\rightarrow$ Ru(d $\pi$ )/acac( $\pi^*$ )                                             |
| 525(476)                                                   | 7580(0.010)                                                        | HOMO-8( $\beta$ ) $\rightarrow$ LUMO+2( $\beta$ )(0.72)                                                              | L( $\pi$ ) $\rightarrow$ Ru(d $\pi$ )/acac( $\pi^*$ )                                                                        |
| 390(390)                                                   | 14470(0.019)                                                       | SOMO1 $\rightarrow$ LUMO+1( $\alpha$ )(0.48)<br>HOMO-14( $\beta$ ) $\rightarrow$ LUMO+3( $\beta$ )(0.23)             | L( $\pi$ )/acac( $\pi$ ) $\rightarrow$ L( $\pi^*$ )<br>Ru(d $\pi$ )/acac( $\pi$ ) $\rightarrow$ Ru(d $\pi$ )/acac( $\pi^*$ ) |
| <b>1a<sup>-</sup> (S=1/2)</b>                              |                                                                    |                                                                                                                      |                                                                                                                              |
| (1729)                                                     | (0.0003)                                                           | HOMO-2( $\beta$ ) $\rightarrow$ LUMO( $\beta$ )(0.98)                                                                | Ru(d $\pi$ )/acac( $\pi$ ) $\rightarrow$ Ru(d $\pi$ )/acac( $\pi^*$ )                                                        |
| 1045(1124)                                                 | 950(0.0003)                                                        | SOMO1 $\rightarrow$ LUMO( $\alpha$ )(0.64)                                                                           | Ru(d $\pi$ )/acac( $\pi$ ) $\rightarrow$ L( $\pi^*$ )                                                                        |
| 660(659)                                                   | 10060(0.074)                                                       | HOMO-8( $\beta$ ) $\rightarrow$ LUMO( $\beta$ )(0.75)                                                                | L( $\pi$ )/Ru(d $\pi$ ) $\rightarrow$ Ru(d $\pi$ )/acac( $\pi^*$ )                                                           |
| 410(397)                                                   | 16080(0.101)                                                       | HOMO-2( $\beta$ ) $\rightarrow$ LUMO+5( $\beta$ )(0.56)                                                              | Ru(d $\pi$ )/acac( $\pi$ ) $\rightarrow$ acac( $\pi^*$ )                                                                     |
| 351(344)                                                   | 16080(0.033)                                                       | HOMO-3( $\alpha$ ) $\rightarrow$ LUMO+1( $\alpha$ )(0.47)<br>HOMO-3( $\beta$ ) $\rightarrow$ LUMO+2( $\beta$ )(0.47) | L( $\pi$ )/acac( $\pi$ ) $\rightarrow$ acac( $\pi^*$ )                                                                       |
| <b>1a<sup>2-</sup> (S=0)</b>                               |                                                                    |                                                                                                                      |                                                                                                                              |
| 660(689)                                                   | 10080(0.012)                                                       | HOMO $\rightarrow$ LUMO(0.52)                                                                                        | Ru(d $\pi$ ) $\rightarrow$ L( $\pi^*$ )                                                                                      |
| 480(533)                                                   | 11600(0.109)                                                       | HOMO-1 $\rightarrow$ LUMO+1(0.42)<br>HOMO-2 $\rightarrow$ LUMO(0.22)                                                 | Ru(d $\pi$ ) $\rightarrow$ L( $\pi^*$ )                                                                                      |
| 380(400)                                                   | 12700(0.122)                                                       | HOMO-4 $\rightarrow$ LUMO+2(0.44)<br>HOMO-5 $\rightarrow$ LUMO+2(0.41)                                               | Ru(d $\pi$ ) $\rightarrow$ acac( $\pi^*$ )                                                                                   |
| <b>2<sup>2+</sup> (S=0)</b>                                |                                                                    |                                                                                                                      |                                                                                                                              |

|                               |              |                                                                                          |                                                                                      |
|-------------------------------|--------------|------------------------------------------------------------------------------------------|--------------------------------------------------------------------------------------|
| 555(539)                      | sh(0.015)    | HOMO-1→LUMO+2(0.49)<br>HOMO→LUMO+2(0.23)                                                 | L( $\pi$ )/Ru(d $\pi$ )→bpy( $\pi^*$ )                                               |
| (508)                         | (0.019)      | HOMO-3→LUMO(0.64)                                                                        | Ru(d $\pi$ )→bpy( $\pi^*$ )                                                          |
| 495(490)                      | 14050(0.137) | HOMO→LUMO+5(0.39)<br>HOMO-2→LUMO+3(0.26)                                                 | L( $\pi$ )/Ru(d $\pi$ )→bpy( $\pi^*$ )<br>Ru(d $\pi$ )→L( $\pi^*$ )                  |
| 420(436)                      | 8500(0.067)  | HOMO-2→LUMO(0.36)<br>HOMO-5→LUMO(0.19)                                                   | Ru(d $\pi$ )→bpy( $\pi^*$ )                                                          |
| 355(393)                      | 18850(0.068) | HOMO-4→LUMO+5(0.39)<br>HOMO-4→LUMO(0.27)                                                 | Ru(d $\pi$ )→bpy( $\pi^*$ )                                                          |
| <b>2<sup>3+</sup> (S=1/2)</b> |              |                                                                                          |                                                                                      |
| (523)                         | (0.023)      | HOMO( $\beta$ )→LUMO+6( $\beta$ )(0.55)                                                  | Ru(d $\pi$ )/L( $\pi$ )→L( $\pi^*$ )/bpy( $\pi^*$ )                                  |
| 493(497)                      | 16380(0.032) | HOMO-1( $\beta$ )→LUMO+4( $\beta$ )(0.62)                                                | Ru(d $\pi$ )/L( $\pi$ )→bpy( $\pi^*$ )                                               |
| (472)                         | (0.011)      | HOMO-2( $\beta$ )→LUMO+3( $\beta$ )(0.46)<br>HOMO-2( $\beta$ )→LUMO+1( $\beta$ )(0.44)   | Ru(d $\pi$ )/L( $\pi$ )→L( $\pi^*$ )<br>Ru(d $\pi$ )/L( $\pi$ )→bpy( $\pi^*$ )       |
| 361(426)                      | 14190(0.069) | HOMO-2( $\alpha$ )→LUMO+3( $\alpha$ )(0.46)<br>HOMO-2( $\beta$ )→LUMO+4( $\beta$ )(0.46) | L( $\pi$ )/Ru(d $\pi$ )→bpy( $\pi^*$ )<br>Ru(d $\pi$ )/L( $\pi$ )→bpy( $\pi^*$ )     |
| (389)                         | (0.036)      | HOMO-4( $\beta$ )→LUMO+1( $\beta$ )(0.56)                                                | Ru(d $\pi$ )/bpy( $\pi$ )→bpy( $\pi^*$ )                                             |
| <b>2<sup>4+</sup> (S=1)</b>   |              |                                                                                          |                                                                                      |
| 493(508)                      | 25540(0.004) | SOMO2→LUMO( $\alpha$ )(0.61)                                                             | L( $\pi$ )→L( $\pi^*$ )                                                              |
| (418)                         | (0.015)      | SOMO2→LUMO( $\alpha$ )(0.32)<br>HOMO( $\beta$ )→LUMO+2( $\beta$ )(0.25)                  | L( $\pi$ )→L( $\pi^*$ )<br>L( $\pi$ )/Ru(d $\pi$ )→L( $\pi^*$ )                      |
| 361(401)                      | 26440(0.022) | SOMO1→LUMO+1( $\alpha$ )(0.58)                                                           | L( $\pi$ )→L( $\pi^*$ )                                                              |
| (360)                         | (0.015)      | HOMO-2( $\beta$ )→LUMO+3( $\beta$ )(0.37)<br>SOMO1→LUMO+5( $\alpha$ )(0.31)              | Ru(d $\pi$ )/L( $\pi$ )→L( $\pi^*$ )<br>L( $\pi$ )→bpy( $\pi^*$ )                    |
| <b>2<sup>+</sup> (S=1/2)</b>  |              |                                                                                          |                                                                                      |
| 493(485)                      | 20000(0.017) | HOMO-5( $\alpha$ )→LUMO+2( $\alpha$ )(0.52)                                              | Ru(d $\pi$ )/bpy( $\pi$ )→L( $\pi^*$ )                                               |
| (436)                         | (0.075)      | HOMO-5( $\beta$ )→LUMO+2( $\beta$ )(0.55)                                                | Ru(d $\pi$ )/L( $\pi$ )→L( $\pi^*$ )                                                 |
| 361(393)                      | 17823(0.021) | HOMO-10( $\alpha$ )→LUMO( $\alpha$ )(0.43)<br>HOMO-9( $\beta$ )→LUMO+2( $\beta$ )(0.38)  | L( $\pi$ )→bpy( $\pi^*$ )<br>L( $\pi$ )→L( $\pi^*$ )                                 |
| <b>2 (S=3/2)</b>              |              |                                                                                          |                                                                                      |
| 591(564)                      | 17440(0.005) | HOMO-7( $\alpha$ )→LUMO( $\alpha$ )(0.65)                                                | Ru(d $\pi$ )/bpy( $\pi$ )→bpy( $\pi^*$ )                                             |
| (517)                         | (0.018)      | HOMO-2( $\beta$ )→LUMO+1( $\beta$ )(0.54)                                                | Ru(d $\pi$ )→bpy( $\pi^*$ )                                                          |
| 389(405)                      | 22585(0.018) | HOMO-1( $\beta$ )→LUMO+5( $\beta$ )(0.51)                                                | Ru(d $\pi$ )/L( $\pi$ )→bpy( $\pi^*$ )                                               |
| <b>2<sup>-</sup> (S=3/2)</b>  |              |                                                                                          |                                                                                      |
| 1057(1038)                    | 3000(0.005)  | SOMO1→LUMO+7( $\alpha$ )(0.82)                                                           | bpy( $\pi$ )→bpy( $\pi^*$ )                                                          |
| 685(680)                      | 12300(0.007) | HOMO-6( $\alpha$ )→LUMO( $\alpha$ )(0.68)                                                | Ru(d $\pi$ )→bpy( $\pi^*$ )                                                          |
| 434(459)                      | 28200(0.102) | SOMO1→LUMO+21( $\alpha$ )(0.46)<br>SOMO2→LUMO+18( $\alpha$ )(0.40)                       | bpy( $\pi$ )→Ru(d $\pi$ )/bpy( $\pi^*$ )<br>bpy( $\pi$ )→bpy( $\pi^*$ )/Ru(d $\pi$ ) |
| 364(376)                      | 38000(0.014) | HOMO-3( $\beta$ )→LUMO+6( $\beta$ )(0.43)<br>HOMO-6( $\alpha$ )→LUMO+3( $\alpha$ )(0.41) | Ru(d $\pi$ )→bpy( $\pi^*$ )                                                          |
| <b>2<sup>-</sup> (S=1/2)</b>  |              |                                                                                          |                                                                                      |
| 1057(1066)                    | 3000(0.005)  | HOMO( $\beta$ )→LUMO+9( $\beta$ )(0.88)                                                  | bpy( $\pi$ )→bpy( $\pi^*$ )                                                          |
| (906)                         | (0.016)      | HOMO( $\beta$ )→LUMO+9( $\beta$ )(0.77)                                                  | bpy( $\pi$ )→bpy( $\pi^*$ )                                                          |
| (856)                         | (0.013)      | SOMO( $\alpha$ )→LUMO+9( $\alpha$ )(0.81)                                                | bpy( $\pi$ )→bpy( $\pi^*$ )                                                          |
| 685(668)                      | 12300(0.010) | HOMO-6( $\alpha$ )→LUMO( $\alpha$ )(0.84)                                                | Ru(d $\pi$ )→bpy( $\pi^*$ )                                                          |
| 434(459)                      | 28200(0.117) | SOMO1→LUMO+20( $\alpha$ )(0.59)                                                          | bpy( $\pi$ )→Ru(d $\pi$ )/bpy( $\pi^*$ )                                             |

|                               |              |                                                                                                                      |                                                                                                                  |
|-------------------------------|--------------|----------------------------------------------------------------------------------------------------------------------|------------------------------------------------------------------------------------------------------------------|
| 364(383)                      | 38000(0.012) | HOMO-12( $\alpha$ ) $\rightarrow$ LUMO( $\alpha$ )(0.52)                                                             | L( $\pi$ ) $\rightarrow$ bpy( $\pi^*$ )                                                                          |
| <b>3<sup>2+</sup> (S=0)</b>   |              |                                                                                                                      |                                                                                                                  |
| 552(599)                      | 15385(0.016) | HOMO-3 $\rightarrow$ LUMO(0.44)<br>HOMO-2 $\rightarrow$ LUMO+1(0.44)                                                 | Ru(d $\pi$ )/pap( $\pi$ ) $\rightarrow$ pap( $\pi^*$ )                                                           |
| 516(517)                      | 11630(0.120) | HOMO-4 $\rightarrow$ LUMO(0.40)<br>HOMO-3 $\rightarrow$ LUMO+3(0.16)                                                 | pap( $\pi$ )/Ru(d $\pi$ ) $\rightarrow$ pap( $\pi^*$ )<br>Ru(d $\pi$ )/pap( $\pi$ ) $\rightarrow$ pap( $\pi^*$ ) |
| (476)                         | (0.053)      | HOMO-6 $\rightarrow$ LUMO(0.33)<br>HOMO-5 $\rightarrow$ LUMO+2(0.22)                                                 | Ru(d $\pi$ )/pap( $\pi$ ) $\rightarrow$ pap( $\pi^*$ )<br>pap( $\pi$ )/Ru(d $\pi$ ) $\rightarrow$ pap( $\pi^*$ ) |
| 458(446)                      | 8175(0.100)  | HOMO $\rightarrow$ LUMO+4(0.40)<br>HOMO-7 $\rightarrow$ LUMO+1(0.11)                                                 | L( $\pi$ )/Ru(d $\pi$ ) $\rightarrow$ L( $\pi^*$ )<br>pap( $\pi$ )/Ru(d $\pi$ ) $\rightarrow$ pap( $\pi^*$ )     |
| 355(380)                      | 31670(0.323) | HOMO-9 $\rightarrow$ LUMO+3(0.33)<br>HOMO-8 $\rightarrow$ LUMO+2(0.33)                                               | pap( $\pi$ )/Ru(d $\pi$ ) $\rightarrow$ pap( $\pi^*$ )                                                           |
| <b>3<sup>3+</sup> (S=1/2)</b> |              |                                                                                                                      |                                                                                                                  |
| (1152)                        | (0.074)      | HOMO-5( $\beta$ ) $\rightarrow$ LUMO( $\beta$ )(0.69)                                                                | Ru(d $\pi$ )/pap( $\pi$ ) $\rightarrow$ L( $\pi^*$ )/Ru(d $\pi$ )                                                |
| 1033(1137)                    | 5248(0.067)  | HOMO-3( $\beta$ ) $\rightarrow$ LUMO( $\beta$ )(0.90)                                                                | pap( $\pi^*$ ) $\rightarrow$ L( $\pi^*$ )/Ru(d $\pi$ )                                                           |
| 542(531)                      | 9060(0.025)  | HOMO-4( $\alpha$ ) $\rightarrow$ LUMO( $\alpha$ )(0.34)<br>HOMO-2( $\beta$ ) $\rightarrow$ LUMO+1( $\beta$ )(0.31)   | L( $\pi$ )/Ru(d $\pi$ ) $\rightarrow$ pap( $\pi^*$ )<br>pap( $\pi$ ) $\rightarrow$ pap( $\pi^*$ )                |
| 361(376)                      | 28240(0.349) | HOMO-2( $\alpha$ ) $\rightarrow$ LUMO+5( $\alpha$ )(0.30)<br>HOMO-1( $\beta$ ) $\rightarrow$ LUMO+6( $\beta$ )(0.28) | pap( $\pi^*$ ) $\rightarrow$ L( $\pi^*$ )                                                                        |
| <b>3<sup>+</sup> (S=1/2)</b>  |              |                                                                                                                      |                                                                                                                  |
| 990(938)                      | 1140(0.005)  | SOMO $\rightarrow$ LUMO+4( $\alpha$ )(0.99)                                                                          | pap( $\pi^*$ ) $\rightarrow$ L( $\pi^*$ )                                                                        |
| 584(590)                      | 11100(0.035) | HOMO-2( $\beta$ ) $\rightarrow$ LUMO+1( $\beta$ )(0.37)<br>HOMO-3( $\beta$ ) $\rightarrow$ LUMO( $\beta$ )(0.36)     | Ru(d $\pi$ )/pap( $\pi$ ) $\rightarrow$ pap( $\pi^*$ )                                                           |
| 483(513)                      | 9926(0.099)  | HOMO-4( $\beta$ ) $\rightarrow$ LUMO( $\beta$ )(0.48)<br>HOMO-5( $\beta$ ) $\rightarrow$ LUMO+1( $\beta$ )(0.43)     | Ru(d $\pi$ )/pap( $\pi$ ) $\rightarrow$ pap( $\pi^*$ )                                                           |
| (459)                         | (0.084)      | HOMO-4( $\beta$ ) $\rightarrow$ LUMO+2( $\beta$ )(0.40)<br>HOMO-10( $\alpha$ ) $\rightarrow$ LUMO( $\alpha$ )(0.18)  | Ru(d $\pi$ )/pap( $\pi$ ) $\rightarrow$ pap( $\pi^*$ )<br>pap( $\pi$ ) $\rightarrow$ pap( $\pi^*$ )              |
| 347(370)                      | 31400(0.327) | HOMO-8( $\beta$ ) $\rightarrow$ LUMO+1( $\beta$ )(0.33)<br>SOMO $\rightarrow$ LUMO+19( $\alpha$ )(0.31)              | pap( $\pi$ ) $\rightarrow$ pap( $\pi^*$ )                                                                        |
| <b>3 (S=1)</b>                |              |                                                                                                                      |                                                                                                                  |
| 1009(887)                     | 12430(0.008) | HOMO-2( $\alpha$ ) $\rightarrow$ LUMO+1( $\alpha$ )(0.53)                                                            | L( $\pi$ )/Ru(d $\pi$ ) $\rightarrow$ pap( $\pi^*$ )                                                             |
| 345(349)                      | 46420(0.407) | HOMO-9( $\beta$ ) $\rightarrow$ LUMO+2( $\beta$ )(0.37)<br>HOMO-8( $\beta$ ) $\rightarrow$ LUMO+3( $\beta$ )(0.27)   | pap( $\pi$ )/Ru(d $\pi$ ) $\rightarrow$ pap( $\pi^*$ )                                                           |

<sup>a</sup>Experimental absorption maxima ( $\lambda_{\max} > 300$  nm) from OTTLE spectroelectrochemistry in CH<sub>2</sub>Cl<sub>2</sub>/0.1 M Bu<sub>4</sub>NPF<sub>6</sub>. <sup>b</sup>Molar extinction coefficients in dm<sup>3</sup>mol<sup>-1</sup>cm<sup>-1</sup>. <sup>c</sup>Calculated oscillator strengths.

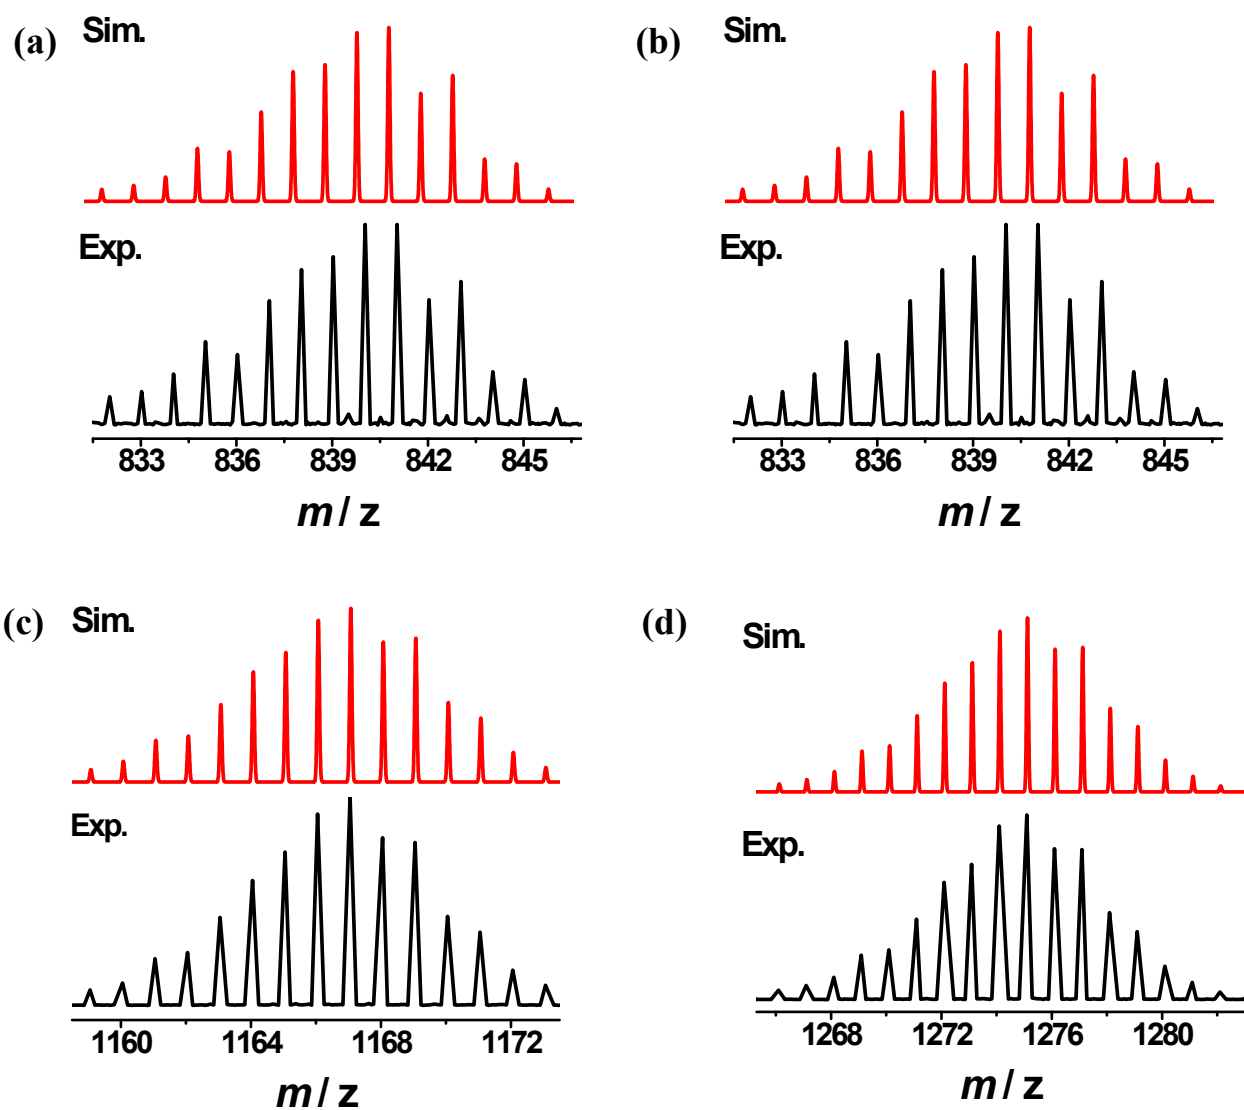

**Fig. S1** ESI-MS(+) of (a)  $[1a]^+$ , (b)  $[1b]^+$ , (c)  $[2(ClO_4)]^+$  and (d)  $[3(ClO_4)]^+$  in  $CH_3CN$ .



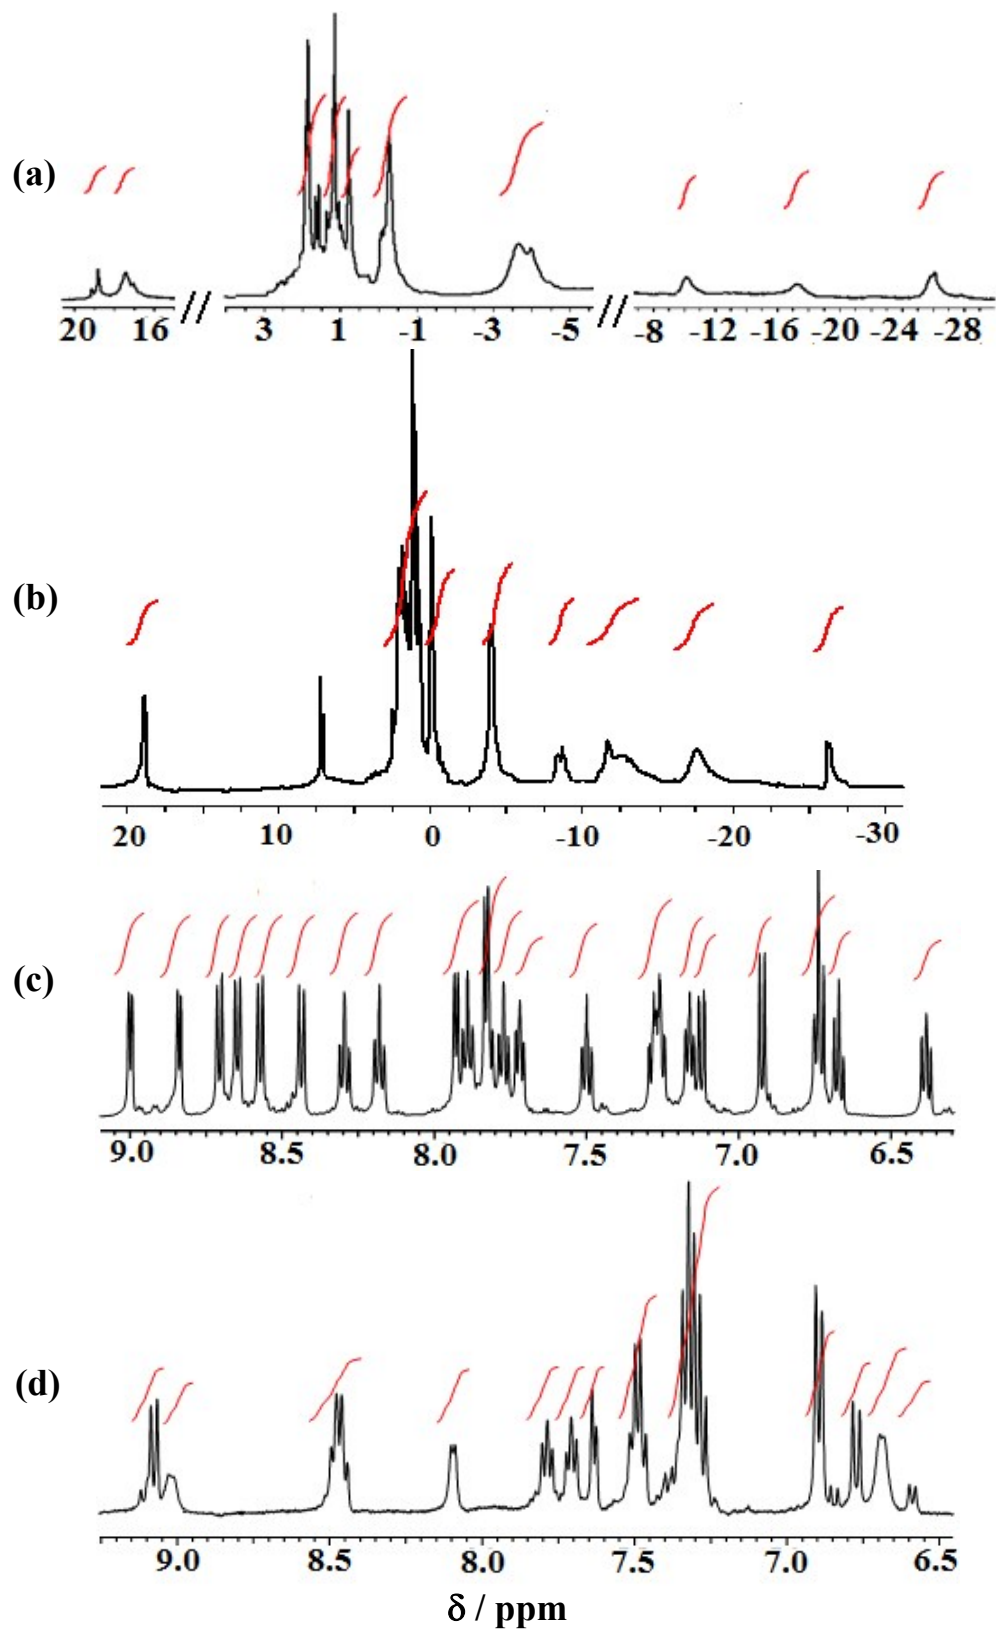

**Fig. S2**  $^1\text{H-NMR}$  spectra of (a) **1a** (in  $\text{CDCl}_3$ ), (b) **1b** (in  $\text{CDCl}_3$ ), (c) **[2](ClO<sub>4</sub>)<sub>2</sub>** (in  $(\text{CD}_3\text{OD})$ ) and (d) **[3](ClO<sub>4</sub>)<sub>2</sub>** (in  $(\text{CD}_3)_2\text{SO}$ ).

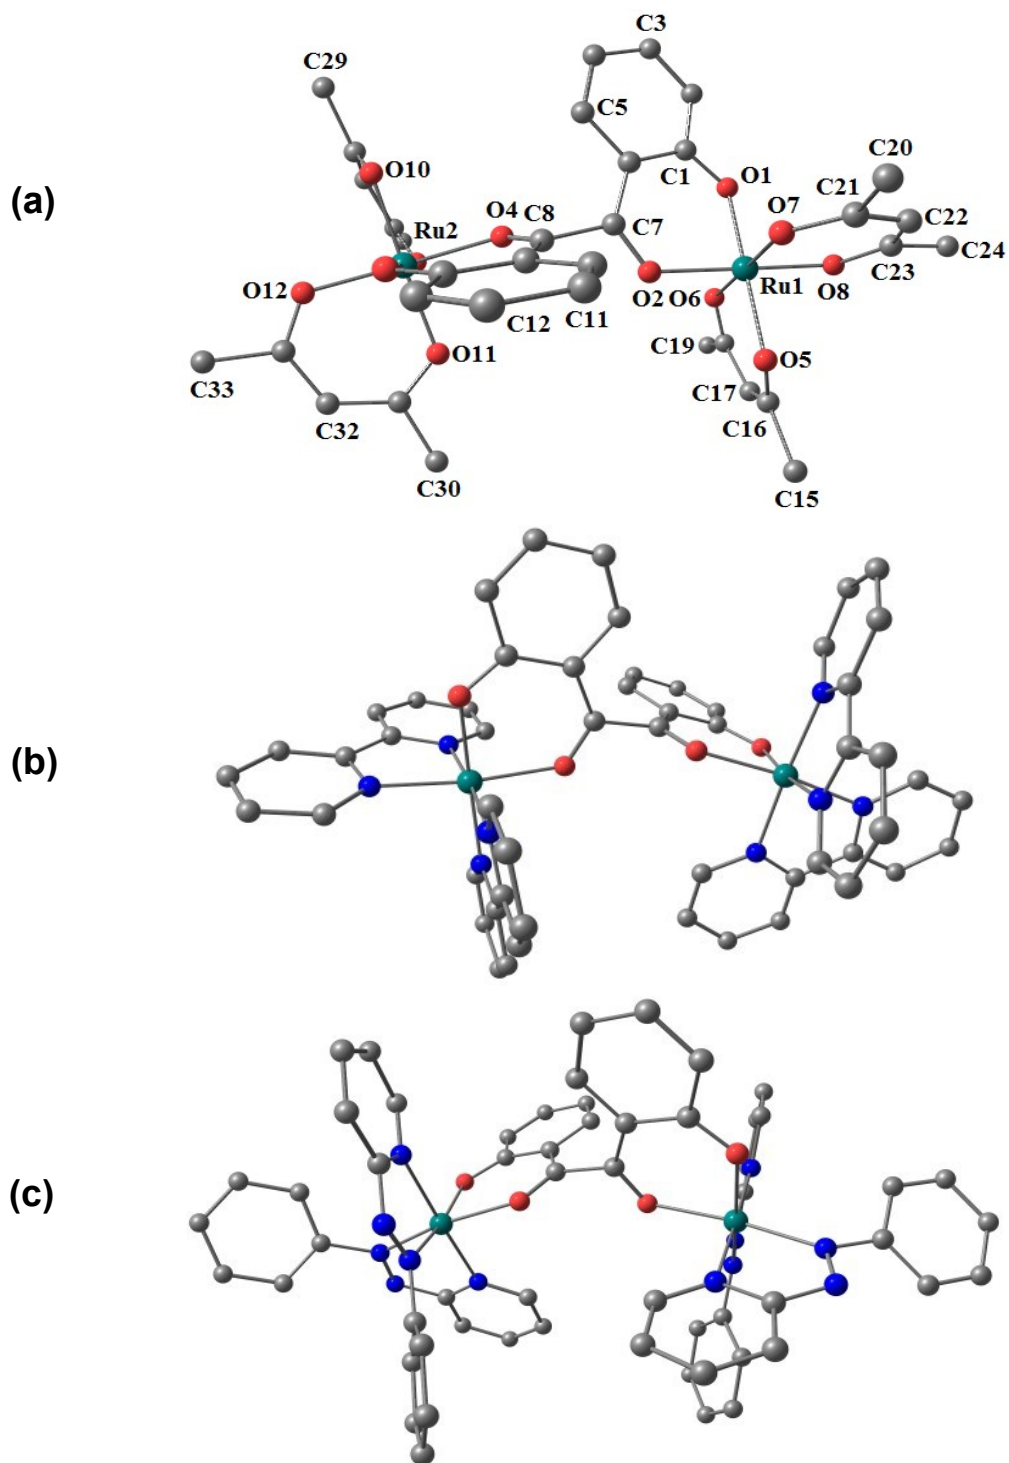

**Fig. S3** DFT optimised structures of (a) **1**, (b)  $[2]^{2+}$  and (c)  $[3]^{2+}$ .

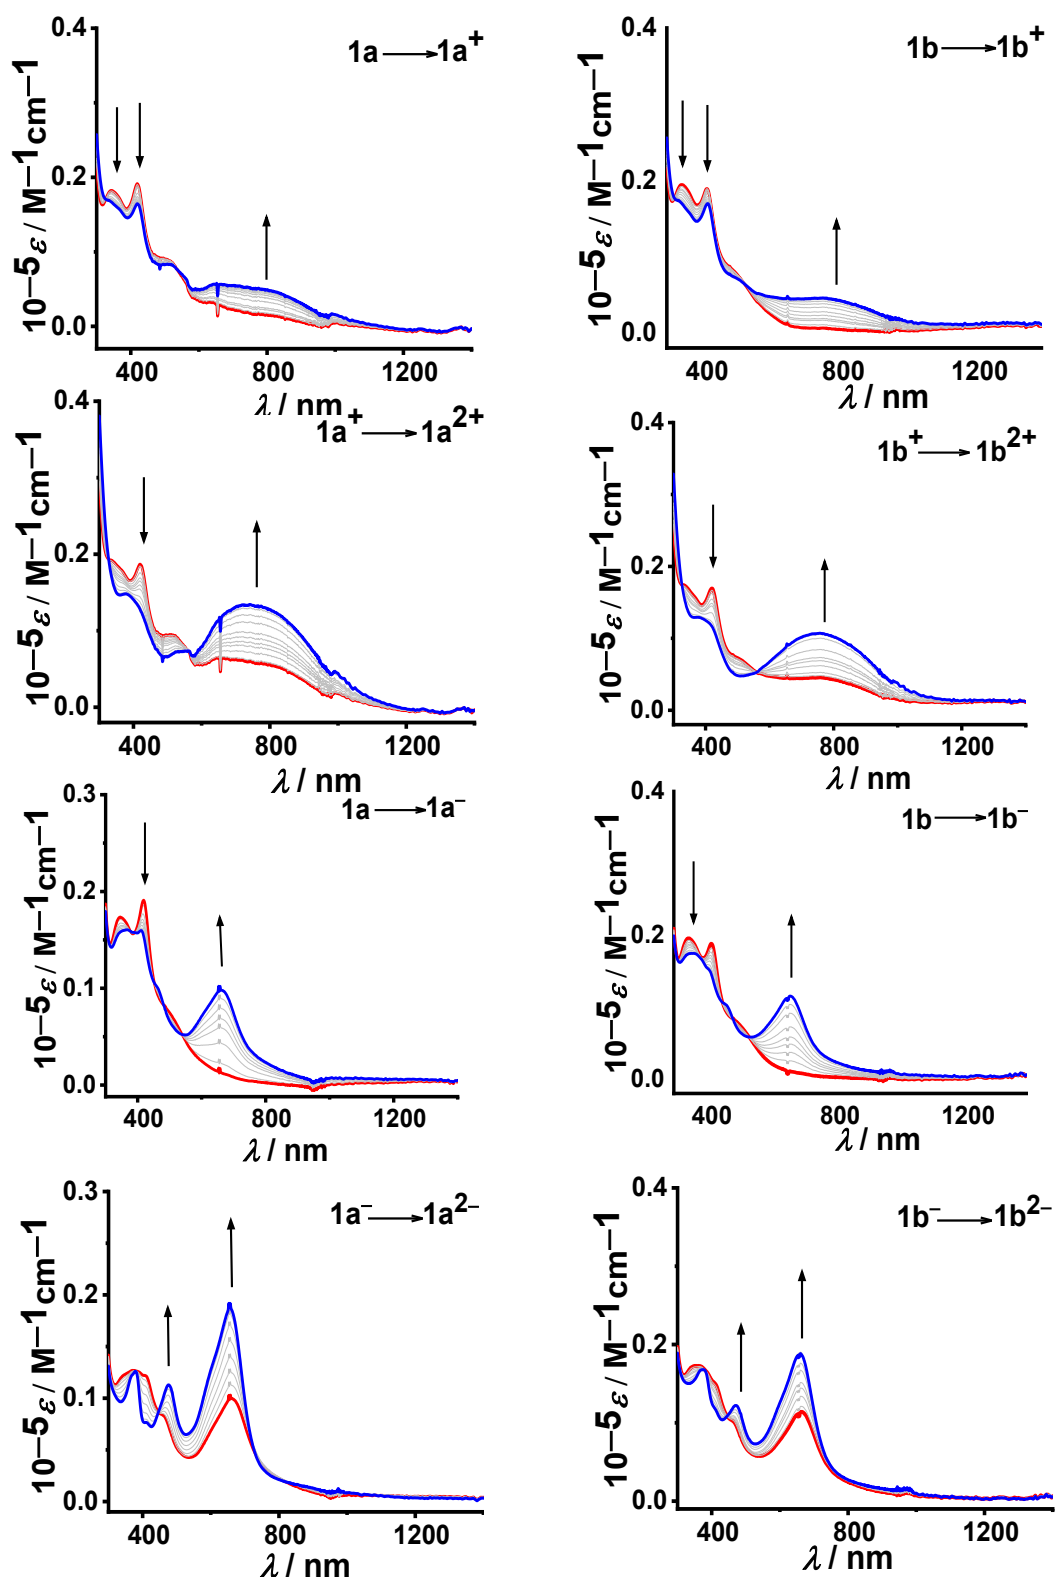

**Fig. S4a** UV-vis-NIR spectroelectrochemical response (on expanded scale) in  $\text{CH}_3\text{CN}/0.1 \text{ M nBu}_4\text{NPF}_6$  for  $1^n$ .

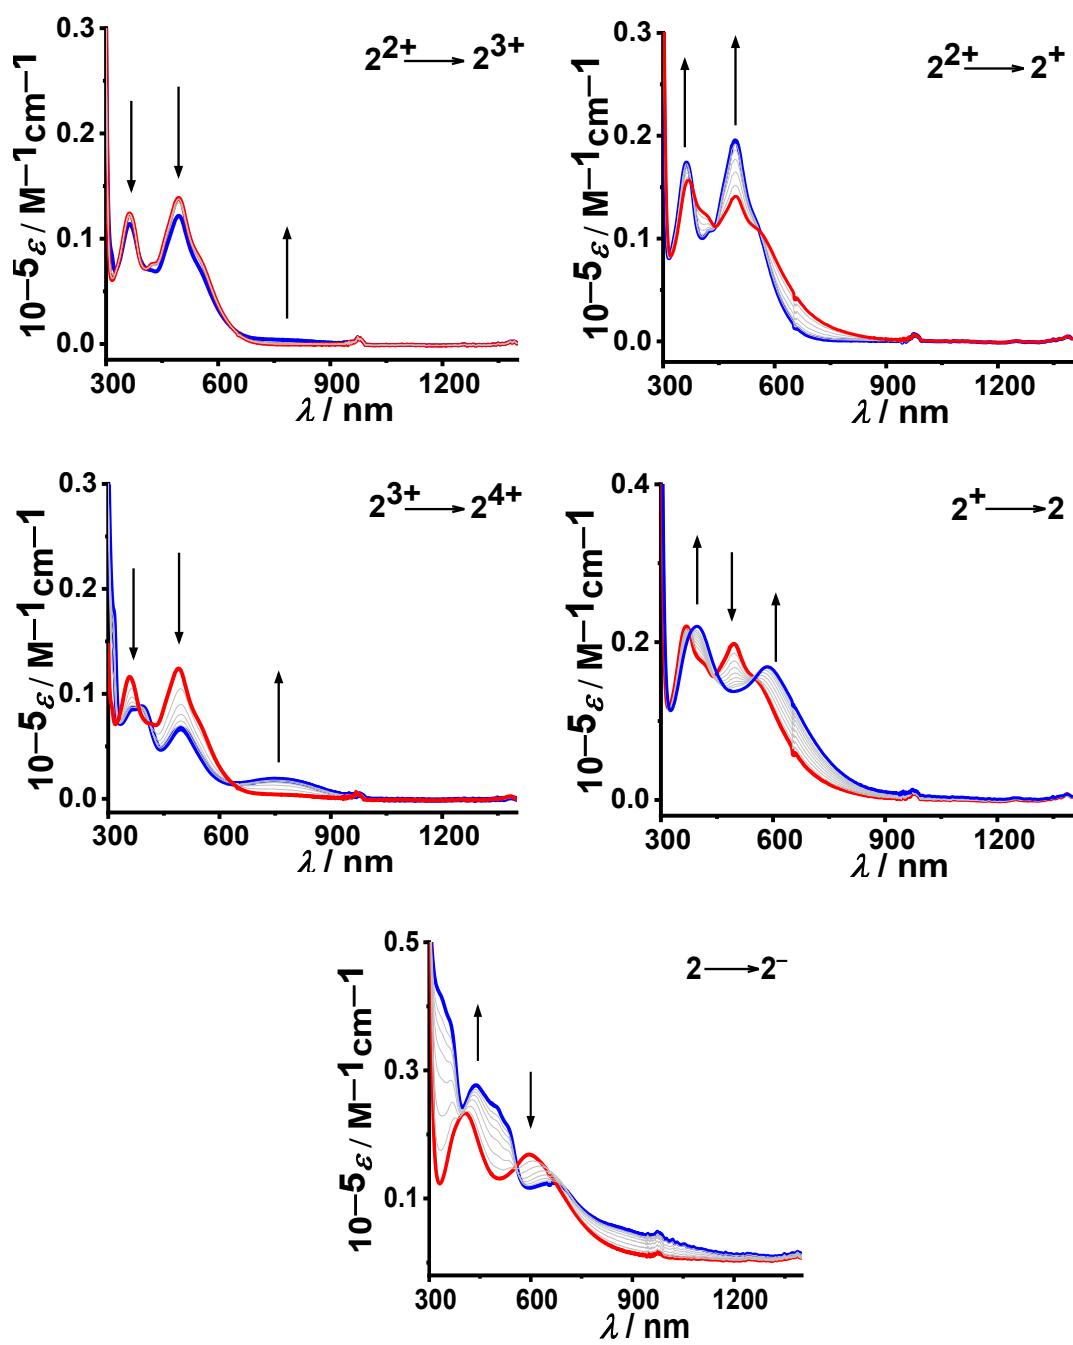

**Fig. S4b** UV-vis-NIR spectroelectrochemical response (on expanded scale) in  $\text{CH}_3\text{CN}/0.1 \text{ M nBu}_4\text{NPF}_6$  for  $2^n$ .

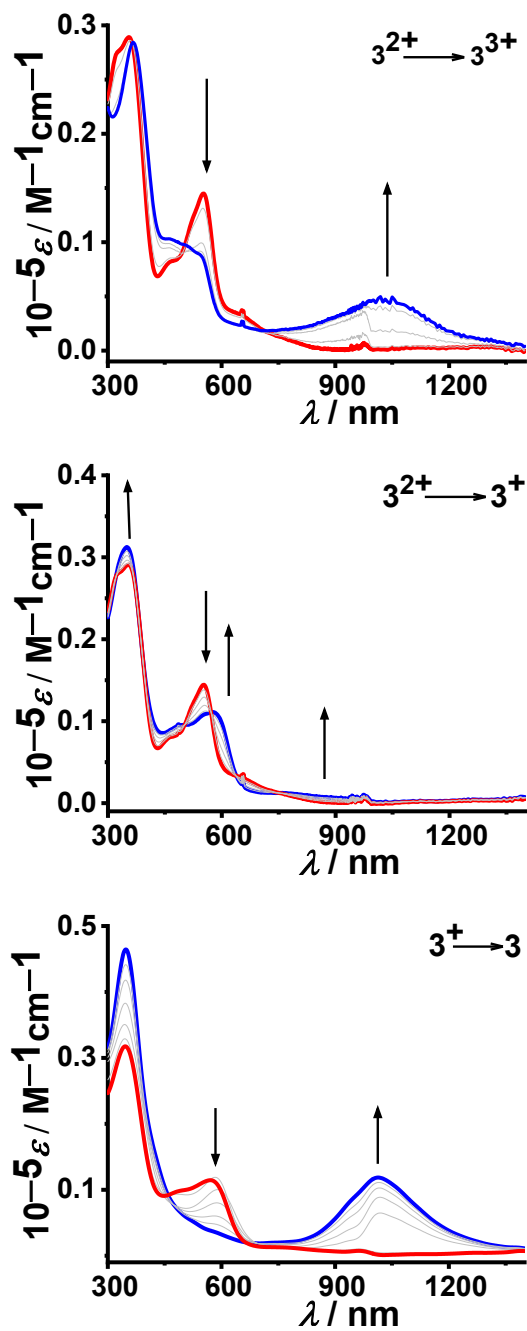

**Fig. S4c** UV-vis-NIR spectroelectrochemical response (on expanded scale) in  $\text{CH}_3\text{CN}/0.1 \text{ M } n\text{Bu}_4\text{NPF}_6$  for  $3^n$ .
